1 **Modifiable Risk Factors for Stroke, Dementia, and Late-Life Depression: A Systematic Review**  
2 **and DALY Weighted Risk Factors for a Composite Outcome**

3

4 Jasper R. Senff, MD<sup>1-5</sup>; Reinier W.P. Tack, MD<sup>1-5</sup>, Akashleena Mallick, MD<sup>1-4</sup>, Leidys Gutierrez-  
5 Martinez, MD MSc<sup>1-4</sup>, Jonathan Duskin MD<sup>1-4,14</sup>, Tamara N. Kimball MD<sup>1-4</sup>, Zeina Chemali MD  
6 MPH<sup>1,2,6</sup>, Amy Newhouse MD<sup>1,7</sup>, Christina Kourkoulis BS<sup>1-4</sup>, Cyprien Rivier MD<sup>8,9</sup>, Guido J Falcone  
7 MD ScD MPH<sup>8,9</sup>, Kevin N Sheth MD PhD<sup>8,9</sup>, Ronald M Lazar MD PhD<sup>10</sup>, Sarah Ibrahim RN PhD<sup>11-  
8 12</sup>, Aleksandra Pikula MD<sup>13-15</sup>, Rudolph E. Tanzi<sup>1</sup> PhD, Gregory Fricchione MD PhD<sup>1,16</sup>, H. Bart  
9 Brouwers MD PhD<sup>5</sup>, Gabrél J.E. Rinkel MD PhD FRCP Edin<sup>5</sup>, Nirupama Yechoor MD<sup>1-4</sup>, Jonathan  
10 Rosand, MD MSc<sup>1-4</sup>; Christopher D. Anderson\* MD MMsc<sup>1-4,16</sup>, Sanjula D. Singh\*, MD PhD MSc<sup>1-5</sup>

11

12 **Affiliations:**

- 13 1. Henry and Allison McCance Center for Brain Health, Massachusetts General Hospital, Boston,  
14 MA, USA
- 15 2. Department of Neurology, Massachusetts General Hospital, Boston, MA, USA
- 16 3. Broad Institute of MIT and Harvard, Cambridge, MA, USA
- 17 4. Center for Genomic Medicine, Massachusetts General Hospital, Boston, MA, USA
- 18 5. Department of Neurology and Neurosurgery, Brain Center Rudolf Magnus, University Medical  
19 Center Utrecht, Utrecht, NL
- 20 6. Division of Neuropsychiatry, Massachusetts General Hospital, Boston, MA, United States
- 21 7. Department of Medicine, Massachusetts General Hospital, Boston, MA, United States,
- 22 8. Department of Neurology, Yale School of Medicine, New Haven, CT, USA
- 23 9. Yale Center for Brain and Mind Health, Yale School of Medicine, New Haven, CT, USA
- 24 10. McKnight Brain Institute, Department of Neurology, School of Medicine, University of Alabama  
25 School of Medicine, Birmingham, AL, United States
- 26 11. Program for Health System and Technology Evaluation, Toronto General Hospital Research  
27 Institute, Department of Neurology, Toronto Western Hospital
- 28 12. Centre for Advancing Collaborative Healthcare & Education (CACHE), University of Toronto

- 29 13. Department of Medicine (Neurology), University of Toronto, Toronto, ON, Canada,  
30 14. Jay and Sari Sonshine Centre for Stroke Prevention and Cerebrovascular Brain Health, Krembil  
31 Brain Institute, University Health Network, Toronto, ON, Canada  
32 15. Lawrence S Bloomberg Faculty of Nursing, University of Toronto, Toronto, ON, Canada  
33 16. Department of Neurology, Brigham and Women’s Hospital, Boston, MA, USA  
34 \* Contributed equally to this manuscript.

35 **Running head:** Modifiable Risk Factors for Brain Disease

36 **Corresponding author:**

- 37 - Sanjula Dhillon Singh  
38 - Email address: [ssingh32@mgh.harvard.edu](mailto:ssingh32@mgh.harvard.edu)  
39 - Address: McCance Center for Brain Health, Massachusetts General Hospital, Harvard  
40 Medical School, 399 Revolution Drive, Somerville, MA 02145, United States of America

41

|    |                        |      |                    |                     |
|----|------------------------|------|--------------------|---------------------|
| 42 | Title character count: | 146  | No. of references: | 159                 |
| 43 | Word count abstract:   | 250  | No. of tables:     | 2 (7 supplementary) |
| 44 | Word count article:    | 3493 | No. of figures:    | 4 (1 supplementary) |

45

## Abstract

46

47 **Background:** At least 60% of stroke, 40% of dementia, and 35% of late-life depression (LLD) are  
48 attributable to modifiable risk factors, with great overlap due to a shared underlying pathophysiology.  
49 This study aims to systematically identify overlapping risk factors for these diseases and calculate  
50 their relative impact on a composite outcome.

51 **Methods:** A systematic literature review was performed in Pubmed, Embase, and PsycInfo, between  
52 January 2000 and September 2023. We included meta-analyses reporting effect sizes of modifiable  
53 risk factors on the incidence of stroke, dementia, and/or LLD. The most relevant meta-analyses were  
54 selected, and Disability Adjusted Life Year (DALY) weighted beta-coefficients were calculated for a  
55 composite outcome. The beta-coefficients were then normalized to assess relative impact.

56 **Results:** Our search yielded 182 meta-analyses meeting the inclusion criteria, of which 59 were  
57 selected to calculate DALY-weighted risk factors for a composite outcome. Identified risk factors  
58 included alcohol use (normalized beta-coefficient highest category: -20), blood pressure (87), BMI  
59 (42), fasting plasma glucose (57), total cholesterol (14), leisure time cognitive activity (-54),  
60 depressive symptoms (34), diet (27), hearing loss (35), kidney function (60), pain (25), physical  
61 activity (-34), purpose in life (-30), sleep (44), smoking (58), social engagement (32), and stress (32).

62 **Discussion:** This study identified overlapping modifiable risk factors and calculated the relative  
63 impact of these factors on the risk of a composite outcome of stroke, dementia, and LLD. These  
64 findings could guide preventative strategies and serve as an empirical foundation for future  
65 development of tools that can empower people to reduce their risk of these diseases.

66

67 **Funding:** US National Institutes of Health and American Heart Association.

68

## Introduction

69 Neurological disorders are the leading cause of disability-adjusted life years (DALYs) worldwide<sup>1</sup>.  
70 This is largely contributed by stroke (>143 million DALYs), dementia (>25 million DALYs), and  
71 depression (>37 million DALYs)<sup>2</sup>. Research indicates that at least 60% of strokes, 40% of dementia,  
72 and 35% of late-life depression (LLD) cases could be prevented or slowed down toward the limit of  
73 human life span through adequate risk factor control<sup>3-6</sup>. Epidemiological studies demonstrate that risk  
74 factors such as blood pressure, blood sugar, cholesterol, diet, body mass index (BMI), physical  
75 activity, smoking, and social isolation are shared among these age-related brain diseases<sup>1,7-10</sup>. This  
76 overlap in risk factors is, at least partially, attributable to the shared underlying pathophysiology of  
77 neurodegenerative and cerebrovascular disease, including cerebral small vessel disease (CSVD) –  
78 with multifaceted impact on cerebral circulation and brain integrity<sup>11,12</sup>.

79

80 Evidence-based tools, such as models or scores, can empower, educate, and motivate both patients  
81 and practitioners to facilitate behavioral changes that reduce modifiable risk factors for age-related  
82 brain diseases<sup>13</sup>. However, the currently available tools that address modifiable risk factors have  
83 limitations. Most existing tools for dementia, stroke, and LLD mostly focus on risk stratification of  
84 individual brain diseases<sup>14-23</sup> or together with cardiovascular disease<sup>10</sup>, lacking a holistic approach  
85 that addresses the shared underlying pathophysiology. In line with the recommendations of the  
86 American Heart Association (AHA) and the American Academy of Neurology (AAN)<sup>10,24,25</sup>, there is a  
87 need to develop, optimize, and implement novel and practical tools that address modifiable risk  
88 factors to substantiate preventive neurology in both primary care and specialized medical care  
89 worldwide.

90

91 While there are overlapping risk factors for stroke, dementia, and LLD, these factors have varying  
92 impacts on each disease<sup>1,7-10</sup>. To develop effective tools for addressing age-related brain diseases  
93 holistically, it is crucial to first understand how overlapping risk factors differentially impact the

94 incidence and burden (expressed in DALYs) of these diseases, which is currently a gap in the  
95 available literature.

96 Therefore, this study aims to identify overlapping risk factors, obtain the most relevant effect sizes,  
97 and calculate their DALY-weighted effect on a composite outcome of stroke, dementia, and LLD.

98 **Methods**

99

100 **Study design**

101 The study design, registered in PROSPERO (identifier: CRD42023476939), is illustrated in Figure 1.

102 The systematic review of the literature was conducted in line with the Joanna Briggs Institute and

103 PRISMA guidelines<sup>26,27</sup>. The search design was based on a PEO (Population, Exposure, Outcome)

104 format<sup>28</sup>.

105

106 **Systematic review of risk models: identifying overlapping risk factors**

107 One authors (JRS) searched PubMed and Embase from January 2000 to July 2023 (Table S1).

108 Inclusion criteria were: (i) indexed reviews, guidelines, development, and validation studies, (ii)

109 studies describing risk models for stroke, dementia, and/or LLD, (ii) models validated with a

110 predictive value with a c-statistic of  $\geq 0.70$ <sup>29</sup>, and (iii) models including modifiable risk factors. We

111 included the most recently validated iteration of any model. Exclusion criteria were: (i) models made

112 for a disease-specific population (e.g., stroke risk in patients with atrial fibrillation) and (ii) machine

113 learning models<sup>30</sup>. Data extraction included author, publication year, model details, cohort details,

114 statistical analysis, risk factors, and outcomes. We selected modifiable risk factors overlapping in at

115 least two diseases for the systematic review of meta-analyses.

116

117 **Systematic review of meta-analyses: obtaining effect sizes of individual diseases per risk factor**

118

119 Search strategy

120 A search was conducted in PubMed, Embase, and PsycInfo between January 2000 and September

121 2023, by two authors: JRS and RWPT (Table S2). Included exposures were the modifiable risk

122 factors previously identified. The outcomes were defined as the incidence of all cause-dementia

123 (including Alzheimer's disease, vascular dementia, and/or all dementia), stroke (including both

124 ischemic and hemorrhagic stroke) and/or LLD. Both authors performed title and abstract screening  
125 and full-text analyses independently from each other. Disagreements were resolved in a consensus  
126 meeting with a third reviewer (SDS). The study selection was performed using Covidence (Covidence  
127 Systematic Review Software Veritas Health Innovation, Melbourne, Australia)<sup>31</sup>.

128

#### 129 Inclusion- and exclusion criteria

130 The inclusion criteria were: (i) meta-analyses of observational studies, (ii) written in English, (iii)  
131 describing a disease-risk factor relationship expressed as an effect size (Relative Risk [RR], Odds  
132 Ratio [OR] or Hazard Ratio [HR]), and (iv) risk factors defined as a dichotomized or categorical  
133 variable. Restriction to meta-analyses ensured a well-powered and feasible overview of the current  
134 literature<sup>32</sup>, while restriction to dichotomized or categorized ensured clinical applicability<sup>33</sup>. For the  
135 dietary components, we included factors as stated (either recommended or contraindicated) by the  
136 AHA and the Dietary Approaches to Stop Hypertension (DASH)<sup>10,34</sup>. Our exclusion criteria included:  
137 (i) disease-specific populations (e.g., patients with atrial fibrillation) (ii) treatments (e.g., cholesterol  
138 levels in statin treatment), and (iii) composite outcomes (e.g., cardiovascular disease instead of stroke)  
139 or subtypes of the outcomes (e.g., ischemic stroke only).

140

#### 141 Data extraction

142 Data extract was performed by one of two authors, JRS and RWPT. Extracted data included first  
143 author, year of publication, exposure definition, outcome definition, effect size including 95%  
144 confidence interval (CI), number of included studies in meta-analyses, total sample size, number of  
145 outcomes, level of heterogeneity ( $I^2$ ), risk of bias (ROB) tool (e.g., Newcastle-Ottawa Scale), ROB  
146 assessment, and publication bias (Egger's test, Begg's test, funnel plot).

147

#### 148 Study selection to identify the most relevant effect sizes

149 Study selection to identify the most relevant effect sizes was performed by two authors (JRS and  
150 RWPT) individually. Disagreements were resolved in a consensus meeting. For each factor, the most  
151 recent meta-analysis was included. Exceptions were made if an earlier meta-analysis had a sample

152 size at least 20% larger. If two meta-analysis had similar sample size selection was based on a  
153 difference in quality assessed through heterogeneity level, ROB assessment, and publication bias. The  
154 initial selection was based on studies that reported RR. If no studies reporting RR were available,  
155 studies reporting HR, or if not available OR, were selected.

156

## 157 **DALY weighted risk factors for a composite outcome**

### 158 Risk factor definition

159 Risk factors cut-offs aligned with the AHA guidelines and Life's Essential 8 where available<sup>10</sup>.

160

### 161 Statistical Analysis

162 Table S4 shows the statistical methodology. To standardize effect sizes and corresponding 95%  
163 confidence interval (CI) we transformed HR and OR to RR based on the disease-specific incidence  
164 rates ( $r$ )<sup>35</sup>. We obtained disease-specific DALYs using the most recent incidence rates from the Global  
165 Burden of Disease study 2019 : "Stroke" (157.99 per 100,000), "Alzheimer diseases and other related  
166 dementias" (93.52 per 100,000), and "Major Depressive Disorder" (3551.60 per 100,000)<sup>2</sup>. To  
167 calculate weighted effect size for a composite outcome of stroke, dementia, and LLD, the relative  
168 risks with corresponding 95% CI for each risk factor category were weighted according to their  
169 attributed burden, expressed in DALYs (stroke: 5.654%, dementia: 0.997%, LLD: 1.461%)<sup>2</sup>. If there  
170 was no effect size for a certain disease-risk factor relationship, the disease was not included in the  
171 weighting. The relative risks that remained significant after calculating the composite effect size were  
172 log transferred into beta ( $\beta$ ) coefficients. To enhance interpretation and assess the relative impact of  
173 the risk factors on a composite outcome, we normalized the beta-coefficient. The lowest  $\beta$ -coefficient  
174 was normalized to 1, scaling all other  $\beta$ -coefficients by the same factor<sup>15</sup>.



175

## Results

176

### 177 **Systematic review of risk models: Identification of overlapping modifiable risk factors**

178 In total, 37 articles describing 54 risk models met inclusion criteria (Figure S1). Of the models, 36  
179 (67%) were on stroke, 16 (30%) on dementia, and two (4%) for LLD; none addressed a composite  
180 outcome. Table S4 provides an overview of the included models.. The models identified 18  
181 modifiable factors that overlapped in at least two outcomes: (1) alcohol consumption, (2) blood  
182 pressure, (3) body mass index (BMI), (4) blood sugar, (5) cholesterol, (6) cognitive activity, (7)  
183 depressive symptoms, (8) diet, (9) hearing impairment, (10) kidney function, (11) pain, (12) physical  
184 activity, (13) self-rated health, (14) sense of belonging, (15) sleep, (16) smoking, (17) social  
185 engagement, and (18) stress.

186

187

### 188 **Systematic review of meta-analyses: obtaining effect sizes of individual diseases per risk factor**

189 Subsequently, our systematic review of meta-analyses yielded 182 articles that met our predefined  
190 criteria, encompassing 426 effect sizes (stroke N=260 [61%], dementia N=157 [37%], LLD N=9  
191 [2%]) on 17 modifiable risk factors (Figure 2). Reported effect size metrics were RRs (N=280 [66%]),  
192 HRs (N=111 [26%]) and ORs (N=35 [8.2%]). All studies that met our criteria are publicly available at  
193 <https://www.zotero.org/groups/5402286/sroma/collections/PY6XGESM>.

194

### 195 Overview of meta-analyses

196

#### 197 *Alcohol*

198 Seven meta-analyses described alcohol intake as a risk factor. For stroke incidence, effect sizes  
199 ranged from 0.80 (95%CI:0.72-0.90) – 0.89 (95%CI:0.76-1.06) for low alcohol intake (<15 gr/day),  
200 0.79 (95%CI:0.69-0.91) – 1.10 (95%CI:0.97-1.24) for moderate alcohol intake (15-30 gr/day), and  
201 1.19 (95%CI:0.93-1.52) – 1.64 (95%CI:1.39-1.93) for heavy alcohol intake (>30 gr/day) (reference no  
202 alcohol intake)<sup>36-40</sup>. For dementia incidence, effect sizes ranged from 0.74 (95%CI:0.61-0.91) – 0.75

203 (95%CI:0.51-1.11) for low-, 0.58 (95%CI:0.38-0.90) – 0.74 (95%CI:0.61-0.91) for moderate-, and  
204 1.00 (95%CI:0.39-2.59) – 1.84 (95%CI:1.01-3.34) for heavy alcohol intake<sup>41,42</sup>. No meta-analyses  
205 were found that assessed the relationship between alcohol intake and LLD incidence.

206

### 207 *Blood Pressure*

208 Twelve meta-analyses described blood pressure as a risk factor. For stroke incidence, effect sizes  
209 ranged from 1.22 (95%CI:0.95-1.57) – 1.66 (95%CI:1.51-1.81) for low pre-hypertension (120-  
210 129/80-84mmHg), 1.79 (95%CI:1.49-2.16) – 1.95 (95%CI:1.73-2.21) for high pre-hypertension (130-  
211 139/85-80 mmHg) and 2.23 (95%CI:2.01-2.48) – 10.92 (95%CI:7.07-16.86) for hypertension  
212 (>140/90 mmHg) (reference blood pressure < 120/80 mmHg)<sup>36,43-48</sup>. For dementia incidence, effect  
213 sizes for hypertension ranged from 0.98 (95%CI:0.72-1.33) – 1.41 (95%CI:1.23-1.62)<sup>49-52</sup>. No meta-  
214 analyses were found that assessed the relationship blood pressure and LLD incidence.

215

### 216 *Body Mass Index*

217 Fifteen meta-analyses described BMI as a risk factor. For stroke incidence, the effect size for  
218 underweight (<18.5 kg/m<sup>2</sup>) was 0.93 (95%CI:0.82-1.06), for overweight (25-29.9 kg/m<sup>2</sup>) it ranged  
219 from 1.18 (95%CI:0.98-1.42) - 2.01 (95%CI:1.65-2.47), and for obesity (≥30kg/m<sup>2</sup>) it ranged from  
220 1.16 (95%CI:1.01-1.35) - 1.47 (95%CI:1.02-2.11) (reference BMI ranging 18.5-25kg/m<sup>2</sup>)<sup>36,47,48,53,54</sup>.  
221 For dementia incidence, the effect sizes for underweights ranged from 0.92 (95%CI:0.74-0.92) - 1.42  
222 (95%CI:1.12-1.80), for overweight from 0.82 (95%CI:0.74-0.92) - 1.26 (95%CI:1.1-1.44), and for  
223 obesity from 0.78 (95%CI:0.70-0.86) - 1.79 (95%CI:1.31-2.41)<sup>50,51,55-62</sup>. No meta-analyses were found  
224 that assessed the relationship BMI and LLD incidence.

225

### 226 *Blood Sugar*

227 Six meta-analyses described blood sugar as a risk factor. For stroke incidence, effect sizes ranged  
228 from 1.08 (95%CI:0.94-1.23) - 1.21 (95%CI:1.02-1.44) for prediabetic blood sugar levels (fasting  
229 plasma glucose [FPG] 100-126 mg/dL), and from 1.79 (95%CI:1.68-1.91) - 2.15 (95%CI:1.76-2.63)  
230 for diabetic blood sugar levels (FPG >126 mg/dL) (reference FPG <100 mg/dL)<sup>36,63-65</sup>. For dementia

231 incidence, effect sizes ranged from 0.72 (95%CI:0.56-0.92) -1.22 (95%CI:1.06-1.41) for prediabetic  
232 blood sugar levels, and from 1.21 (95%CI:1.06-1.37) - 1.49 (95%CI:1.10-2.03) for diabetic blood  
233 sugar levels<sup>51,66</sup>. No meta-analyses were found that assessed the relationship blood sugar and LLD  
234 incidence.

235

#### 236 *Cholesterol*

237 Fifteen meta-analyses described cholesterol as a risk factor. For stroke incidence, effect sizes ranged  
238 from 0.99 (95%CI:0.87-1.12) – 1.14 (95%CI:1.03-1.27) for high total cholesterol, and was 1.09  
239 (95%CI:0.85-1.39) for low-density lipoprotein (LDL) (reference lowest quartiles cholesterol  
240 level)<sup>36,43,47,48,67-71</sup>. For dementia incidence, effect sizes ranged from 1.03 (95%CI:0.74-1.43) – 1.82  
241 (95%CI:1.27-2.6) for high total cholesterol<sup>50,51,56,72,73</sup>. For LLD, the effect size for the presence of  
242 dyslipidemia was 1.08 (95%CI:0.91-1.28)<sup>74</sup>.

243

#### 244 *Cognitive activity*

245 One meta-analysis described cognitive activity as a risk factor for dementia incidence, with an effect  
246 size of 0.61 (95%CI:0.42-0.90) (reference no cognitive activity)<sup>75</sup>. No meta-analyses were found that  
247 assessed the relationship cognitive activity and stroke or LLD incidence.

248

#### 249 *Depressive symptoms*

250 One meta-analysis described depressive symptoms as a risk factor for stroke incidence, with an effect  
251 size of 1.36 (95%CI:1.13-1.51) (reference no depressive symptoms)<sup>76</sup>. No meta-analyses were found  
252 that assessed the relationship depressive symptoms and dementia or LLD incidence.

253

#### 254 *Diet*

255 For stroke, a meta-analysis was included for all 11 dietary components<sup>77-87</sup>. For dementia, meta-  
256 analyses for dairy, fish, sugar-sweetened beverages and saturated fats intake were retrieved and  
257 included<sup>88-91</sup>. No meta-analyses were found that assessed the relationship diet and LLD incidence.

258

259 *Hearing loss*

260 Three meta-analyses described hearing loss as a risk factor. The effect size was 1.33 (95%CI:1.18-  
261 1.49) for stroke<sup>92</sup>, 1.59 (95%CI:1.37-1.86) for dementia<sup>93</sup>, and 1.47 (95%CI:1.31-1.65) for LLD  
262 incidence (reference no hearing loss)<sup>94</sup>.

263

264 *Kidney Function*

265 Four meta-analyses described kidney function as a risk factor. For stroke incidence, the effect size  
266 ranged from 1.07 (95%CI:0.98-1.17) - 1.10 (95%CI:1.03-1.19) for mild-, was 1.43 (95%CI:1.33-  
267 1.54) for moderate- (eGFR 30-60mL/min/1.73m<sup>2</sup>) and 1.70 (95%CI:1.47-1.96) for severe kidney  
268 disease (eGFR <30mL/min/1.73m<sup>2</sup>) (reference eGFR ≥90mL/min/1.73min<sup>2</sup>)<sup>36,95,96</sup>. For dementia  
269 incidence, the effect size was 1.14 (95%CI:1.06-1.22) for mild-, 1.31 (95%CI:0.92-1.87) for  
270 moderate-, and 1.91 (95%CI:1.21-3.01) for severe kidney disease<sup>97</sup>. No meta-analyses were found  
271 that assessed the relationship depressive symptoms and LLD incidence.

272

273 *Pain*

274 One meta-analysis described the pain as a risk factor for dementia incidence, with an effect size of  
275 1.26 (95%CI:1.18-1.35) (reference no pain)<sup>98</sup>. No meta-analyses were found that assessed the  
276 relationship pain and stroke or LLD incidence.

277

278 *Physical activity*

279 Eleven meta-analyses described physical activity as a risk factor. For stroke incidence, effects sizes  
280 for a moderate level of physical activity ranged from 0.64 (95%CI:0.48-.0.87) – 0.85 (95%CI:0.78-  
281 0.93), and was 0.73 (0.67-0.79) for a high level of physical activity (reference low level of physical  
282 activity)<sup>43,99–101</sup>. For dementia incidence, effect sizes for a moderate level of physical activity ranged  
283 from 0.76 (95%CI:0.61-0.94) – 0.80 (95%CI:0.67-0.94), and from 0.63 (95%CI:0.45-0.89) – 0.80  
284 (95%CI:0.77-0.84) for a high level of physical activity<sup>51,101–106</sup>. No meta-analyses were found that  
285 assessed the relationship physical activity and LLD incidence.

286

287 *Purpose in life*

288 Three meta-analyses described purpose in life as a risk factor for dementia<sup>107-109</sup>, with effect sizes  
289 ranging from 0.76 (95%CI:0.72-0.79) – 0.81 (95%CI:0.78-0.85) (reference no purpose in life)<sup>107-109</sup>.  
290 No meta-analyses were found that assessed the relationship purpose in life and stroke or LLD  
291 incidence.

292

293 *Sleep*

294 Fourteen meta-analyses described sleep as a risk factor. For stroke incidence, the effect sizes of short  
295 sleep ( $\leq 6$  hours) ranged from 1.00 (95%CI:0.97-1.24) – 1.71(95%CI:1.39-2.02), for long sleep ( $\geq 8$   
296 hours) it ranged from 1.12 (95%CI:1.01-1.24) – 2.12 (95%CI:1.51-2.73), and for insomnia the effect  
297 size was 1.55 (95%CI:1.39-1.72) (reference 6-8 hours of sleep)<sup>36,110-117</sup>. For dementia incidence, the  
298 effect size for long sleep was 1.77 (95%CI:1.32-2.37), for short sleep 1.20 (95%CI:0.91-1.59), for  
299 insomnia it ranged 1.17 (95%CI 0.95-1.43) – 1.53 (95%CI:1.07-2.18), and for sleep disturbance, it  
300 was 1.19 (95%CI1.11-1.29)<sup>118-120</sup>. For LLD, the effect sizes for sleep disturbance ranged from 1.2  
301 (95%CI:0.80-1.70) – 1.82 (95%CI:1.69-1.97)<sup>121,122</sup>.

302

303 *Smoking*

304 Fifteen meta-analyses described smoking as a risk factor. For stroke incidence, the effect sizes ranged  
305 from 1.08 (95%CI:1.03-1.13) – 1.30 (95%CI:0.93-1.81) for former smokers, and from 1.31  
306 (95%CI:1.20-1.43) – 1.84 (1.72-.198) for current smokers (reference never smoked)<sup>36,43,47,48,123-126</sup>. For  
307 dementia incidence, the effect sizes ranged from 0.99 (95%CI:0.81-1.21) – 1.01 (95%CI:0.96-1.06)  
308 for former smokers, and from 1.27 (95%CI:1.02-1.60) – 1.30 (95%CI:1.18-1.45) for current smokers  
309 <sup>50,51,56,127-129</sup>. For LLD, the effect size for current smoking was 1.35 (95%CI:1.00-1.81)<sup>74</sup>.

310

311 *Social Engagement*

312 Seven meta-analyses described social engagement as a risk factor. For stroke incidence, the effect size  
313 for social isolation/loneliness was 1.32 (95%CI:1.04-1.68), and 0.77 (95%CI: 0.57-1.04) for having a  
314 larger social network (reference not being lonely / small social network)<sup>130,131</sup>. For dementia

315 incidence, the effect size for social isolation/loneliness ranged from 1.23 (95%CI:1.16-1.31) – 1.58  
316 (95%CI:0.80-3.12), and was 0.81 (95%CI:0.74-0.89) for having a larger social network<sup>132-136</sup>. No  
317 meta-analyses were found that assessed the relationship social engagement and LLD incidence.

318

319 *Stress*

320 Two meta-analyses described stress as a risk factor. For stroke incidence, the effect size was 1.33  
321 (95%CI:1.17-1.50) (reference no perceived stress)<sup>137</sup>. For dementia incidence, the effect size was 1.44  
322 (95%CI:1.07-1.95)<sup>138</sup>. No meta-analyses were found that assessed the relationship stress and LLD  
323 incidence.

324

### 325 **Study selection to identify the most relevant effect sizes**

326 Of 182 meta-analyses that met the inclusion criteria, 59 were selected to calculate DALY-weighted  
327 risk factors for a composite outcome. An overview of the selected studies is presented in Table 1, with  
328 the reasoning for selection detailed in Table S5. Study characteristics are reported in Table S6.

329

### 330 **DALY weighted risk factors for a composite outcome**

331 The calculated DALY weighted effect sizes for each risk factors are presented in Table 2 and Figure  
332 3 (intermediate calculations Table S7). Highest risk of age-related brain disease were found in  
333 hypertension, with a normalized beta of 87 and severe kidney disease (eGFR<30 ml/min/1.73m<sup>2</sup>),  
334 with a normalized beta of 60. The highest protective effect sizes were found in leisure time cognitive  
335 activity, with a normalized beta of -54 and high levels of physical activity with a normalized beta of -  
336 34 (Figure 4).

337

## Discussion

338

339 This study identified 18 overlapping modifiable risk factors for stroke, dementia, and LLD and  
340 calculated their relative impacts on a composite outcome using DALY-weighted beta-coefficients. By  
341 analyzing data from two systematic reviews, we weighted these risk factors according to their  
342 contribution to the burden of age-related brain diseases. This approach provided a comprehensive  
343 understanding of the relative impacts of each risk factor on the risk of a composite outcome of age-  
344 related brain disease.

345

346 When assessing individual components, hypertension was the factor with the highest individual  
347 weight. This is mainly attributable to the well-established significant association between stroke and  
348 hypertension<sup>3,139</sup>, and is reinforced by our methods' DALY-based weighting system, which assigns  
349 greater impact to stroke compared to dementia or LLD<sup>140</sup>. Cholesterol showed limited weight with no  
350 significant LDL effect. We focused on all strokes, not distinguishing between ischemic and  
351 hemorrhagic types, which might have attenuated the effect due to the contradicting impact of  
352 cholesterol levels across stroke subtypes<sup>141</sup>. Additionally, excluding meta-analysis on specific  
353 treatments or dose-responses limited available cholesterol studies. We also revealed substantial  
354 weights of leisure time cognitive activities, purpose in life, and absence of social isolation. These  
355 weights are mainly due to their association with dementia, where reverse causality may play a  
356 significant role<sup>142</sup>. Further, long sleep duration emerged as a major risk factor, potentially due to its  
357 relationship with possible confounders such as obesity, hypertension, and diabetes or due to reverse  
358 causality or confounding by aging. We focused on individual dietary elements as outlined by AHA  
359 Life's Essential 8 and the DASH diet. While we did not explore the complex interplay between these  
360 dietary components<sup>118,143,144</sup>, there could be an overestimation of the weights of diet if combined in a  
361 future tool that builds on the results of our analysis<sup>145</sup>. Furthermore, dietary comparisons were often  
362 made between the highest and lowest quartiles, limiting the clinical applicability. Pain showed a  
363 significant effect on dementia risk, likely due to the direct effects of pain and the associated reduction  
364 in physical activity<sup>98</sup>, as well as possible reverse causality<sup>146</sup>. Finally, depression was included in our

365 analysis not only as an outcome but also as a risk factor due to its bidirectional associations with  
366 vascular brain disease<sup>147</sup>. Depressive symptoms showed an increased risk of stroke, which might be  
367 due to both immunological and inflammation effects<sup>148</sup>, as well as its association with poor health  
368 behaviors such as smoking and physical inactivity<sup>149</sup>. As we did not include disease-specific  
369 populations, we did not assess the associations of post-stroke and post-dementia depression<sup>150,151</sup>.

370

371 Some limitations should be considered when interpreting our results. First, we only included  
372 overlapping risk factors across the three age-related brain diseases, thereby possibly excluding  
373 important modifiable risk factors for an individual disease, such as personality attributes and  
374 maladaptive thoughts and behaviors for LLD<sup>152</sup>. However, emerging evidence shows similarities in  
375 the biological pathology of dementia, stroke, and LLD, particularly due to small vessel disease -  
376 which subsequently has overlapping modifiable risk factors<sup>3,9,153</sup>. Second, potential interactions  
377 between risk factors, such as interactions or collinearity, were not considered<sup>143,154</sup>. Third, variations  
378 in definitions across different meta-analyses were encountered during our weighted risk factor  
379 calculations, which limited our use of these categorizations. Fourth, the potential for bias (including  
380 reverse causality, particularly important for dementia with its extended prodromal stages) and  
381 confounding presents a significant challenge and may have influenced the effect sizes<sup>155</sup>. Fifth, we  
382 limited inclusion criteria to articles written in English. Finally, the limited amount of published meta-  
383 analyses on LLD risk factors could affect our risk factor weight calculations' overall  
384 comprehensiveness, and representativeness.

385

386 Given the limited meta-analyses on modifiable risk factors for LLD, future research should prioritize  
387 producing high-quality meta-analyses in this area. The overlap in modifiable risk factors presents an  
388 opportunity to simultaneously reduce the risk of stroke, dementia, and LLD. Developing holistic tools  
389 or models that effectively address these factors could facilitate the prevention and management of  
390 age-related brain diseases<sup>10,24,25</sup>. This study provided insights into the relative impact of modifiable  
391 risk factors, filling a critical gap in the literature necessary for building such comprehensive tools or  
392 models. Future research can use our findings as an empirical foundation for building such tools.



393 Future studies should explore certain areas that our current calculations have not fully resolved, to  
394 enhance the development of a tool or model ready for validation. These areas include assessing the  
395 utility and feasibility of the findings, which should incorporate an evaluation of social determinants of  
396 health, as well as refining the calibration process. These shortcomings could be addressed in a Delphi  
397 process<sup>156</sup>, ensuring the development of a comprehensive tool that leverages all available evidence to  
398 empower, educate, and motivate patients and practitioners to adopt lifestyle changes and reduce the  
399 risk of stroke, dementia, and LLD<sup>13</sup>.

400

#### 401 **Conclusion**

402 In this study, we systematically identified overlapping modifiable risk factors and calculated the  
403 relative impact of these factors on the risk of a composite outcome of stroke, dementia, and  
404 depression. These findings could guide preventative strategies and could serve as an empirical  
405 foundation for future development of tools that can empower people to change modifiable risk factors  
406 associated with these diseases.

## **Disclosures**

C.D.A. receives sponsored research support from the US National Institutes of Health, the American Heart Association, and Bayer AG, and has consulted for ApoPharma. M.C. is supported by the Wellcome Trust [grant number 205339/Z/16/Z]. JR receives sponsored research support from the US National Institutes of Health and the American Heart Association, receives payments for consulting and expert testimony from the National Football League, consulting for Eli Lilly, and has a leadership or fiduciary role at Columbia University and Lancet Neurology. G.F. receives sponsored research support from the National Institute of Mental Health Clinical Global Mental Health Research T32 Fellowship, receives royalties or licenses from Johns Hopkins University Press, University of Chicago Press, Belvoir Press, and the American Psychiatric Press, is on a Data Safety Monitoring Board or Advisory Board of Healthy Hearts Healthy Minds DSMB, is a Board of Directors member at the Rosalynn Carter Institute, and has stock or stock options from Revival Therapeutics Consultant.

## **Data sharing statement**

This manuscript only utilized previously published data. All data employed in this study, including the intermediate calculations, are comprehensively presented in the supplementary tables accompanying this manuscript. Should there be any inquiries or requests for further clarification regarding the data, please contact the corresponding author.

## **Acknowledgment**

Funding: US National Institutes of Health and American Heart Association.

## References

1. Global, regional, and national burden of neurological disorders, 1990-2016: a systematic analysis for the Global Burden of Disease Study 2016. *Lancet Neurol.* 2019;18(5):459-480. doi:10.1016/S1474-4422(18)30499-X
2. Global Burden of Disease Collaborative Network. Global Burden of Disease Study 2019 (GBD 2019). *Seattle, United States: Institute for Health Metrics and Evaluation (IHME)*. Published online 2020.
3. Global, regional, and national burden of stroke and its risk factors, 1990-2019: a systematic analysis for the Global Burden of Disease Study 2019. *Lancet Neurol.* 2021;20(10):795-820. doi:10.1016/S1474-4422(21)00252-0
4. Tsao CW, Aday AW, Almarzooq ZI, et al. Heart Disease and Stroke Statistics-2022 Update: A Report From the American Heart Association. *Circulation.* 2022;145(8):e153-e639. doi:10.1161/CIR.0000000000001052
5. Zenebe Y, Akele B, W/Selassie M, Necho M. Prevalence and determinants of depression among old age: a systematic review and meta-analysis. *Ann Gen Psychiatry.* 2021;20(1):55. doi:10.1186/s12991-021-00375-x
6. Chang SC, Pan A, Kawachi I, Okereke OI. Risk factors for late-life depression: A prospective cohort study among older women. *Prev Med.* 2016;91:144-151. doi:10.1016/j.ypmed.2016.08.014
7. Global, regional, and national burden of stroke and its risk factors, 1990-2019: a systematic analysis for the Global Burden of Disease Study 2019. *Lancet Neurol.* 2021;20(10):795-820. doi:10.1016/S1474-4422(21)00252-0
8. Global, regional, and national burden of 12 mental disorders in 204 countries and territories, 1990-2019: a systematic analysis for the Global Burden of Disease Study 2019. *Lancet Psychiatry.* 2022;9(2):137-150. doi:10.1016/S2215-0366(21)00395-3
9. Livingston G, Huntley J, Sommerlad A, et al. Dementia prevention, intervention, and care: 2020 report of the Lancet Commission. *Lancet.* 2020;396(10248):413-446. doi:10.1016/S0140-6736(20)30367-6
10. Lloyd-Jones DM, Allen NB, Anderson CAM, et al. Life's Essential 8: Updating and Enhancing the American Heart Association's Construct of Cardiovascular Health: A Presidential Advisory From the American Heart Association. *Circulation.* 2022;146(5):e18-e43. doi:10.1161/CIR.0000000000001078
11. Empana JP, Boutouyrie P, Lemogne C, Jouven X, van Sloten TT. Microvascular Contribution to Late-Onset Depression: Mechanisms, Current Evidence, Association With Other Brain Diseases, and Therapeutic Perspectives. *Biological Psychiatry.* 2021;90(4):214-225. doi:10.1016/j.biopsych.2021.04.012
12. Cannistraro RJ, Badi M, Eidelman BH, Dickson DW, Middlebrooks EH, Meschia JF. CNS small vessel disease: A clinical review. *Neurology.* 2019;92(24):1146-1156. doi:10.1212/WNL.0000000000007654

13. Singh SD, Gutierrez-Martinez L, Newhouse A, Sonni A, Chemali Z, Rosand J. Brain health begins with brain care. *Lancet Neurol.* 2022;21(11):961-962. doi:10.1016/S1474-4422(22)00397-0
14. Schiepers OJG, Köhler S, Deckers K, et al. Lifestyle for Brain Health (LIBRA): a new model for dementia prevention. *Int J Geriatr Psychiatry.* 2018;33(1):167-175. doi:10.1002/gps.4700
15. Anstey KJ, Cherbuin N, Herath PM. Development of a new method for assessing global risk of Alzheimer's disease for use in population health approaches to prevention. *Prev Sci.* 2013;14(4):411-421. doi:10.1007/s11121-012-0313-2
16. D'Agostino RB, Wolf PA, Belanger AJ, Kannel WB. Stroke risk profile: adjustment for antihypertensive medication. The Framingham Study. *Stroke.* 1994;25(1):40-43. doi:10.1161/01.str.25.1.40
17. Cattelani L, Murri MB, Chesani F, Chiari L, Bandinelli S, Palumbo P. Risk Prediction Model for Late Life Depression: Development and Validation on Three Large European Datasets. *IEEE J Biomed Health Inform.* 2019;23(5):2196-2204. doi:10.1109/JBHI.2018.2884079
18. Hippisley-Cox J, Coupland C, Brindle P. Derivation and validation of QStroke score for predicting risk of ischaemic stroke in primary care and comparison with other risk scores: a prospective open cohort study. *BMJ.* 2013;346:f2573. doi:10.1136/bmj.f2573
19. Xing X, Yang X, Liu F, et al. Predicting 10-Year and Lifetime Stroke Risk in Chinese Population. *Stroke.* 2019;50(9):2371-2378. doi:10.1161/STROKEAHA.119.025553
20. Qiao Q, Gao W, Laatikainen T, Vartiainen E. Layperson-oriented vs. clinical-based models for prediction of incidence of ischemic stroke: National FINRISK Study. *Int J Stroke.* 2012;7(8):662-668. doi:10.1111/j.1747-4949.2011.00692.x
21. Fisher S, Hsu A, Mojaverian N, et al. Dementia Population Risk Tool (DemPoRT): study protocol for a predictive algorithm assessing dementia risk in the community. *BMJ Open.* 2017;7(10):e018018. doi:10.1136/bmjopen-2017-018018
22. Barnes DE, Beiser AS, Lee A, et al. Development and validation of a brief dementia screening indicator for primary care. *Alzheimers Dement.* 2014;10(6):656-665.e1. doi:10.1016/j.jalz.2013.11.006
23. Huque MH, Kootar S, Eramudugolla R, et al. CogDrisk, ANU-ADRI, CAIDE, and LIBRA Risk Scores for Estimating Dementia Risk. *JAMA Netw Open.* 2023;6(8):e2331460. doi:10.1001/jamanetworkopen.2023.31460
24. Rost NS, Salinas J, Jordan JT, et al. The Brain Health Imperative in the 21st Century—A Call to Action. *Neurology.* 2023;101(13):570-579. doi:10.1212/WNL.0000000000207739

25. Lazar RM, Howard VJ, Kernan WN, et al. A Primary Care Agenda for Brain Health: A Scientific Statement From the American Heart Association. *Stroke*. 2021;52(6):e295-e308. doi:10.1161/STR.0000000000000367
26. *The Joanna Briggs Institute (2014) Joanna Briggs Institute Reviewers' Manual. 2014 Edition, The Joanna Briggs Institute. [Http://Joannabriggs.Org/Assets/Docs/Sumari/ReviewersManual-The-Systematic-Review-of-Economic-Evaluation-Evidence-2014\\_v2.Pdf](http://Joannabriggs.Org/Assets/Docs/Sumari/ReviewersManual-The-Systematic-Review-of-Economic-Evaluation-Evidence-2014_v2.Pdf).*
27. Page MJ, McKenzie JE, Bossuyt PM, et al. The PRISMA 2020 statement: an updated guideline for reporting systematic reviews. *BMJ*. 2021;372:n71.
28. Munn Z, Stern C, Aromataris E, Lockwood C, Jordan Z. What kind of systematic review should I conduct? A proposed typology and guidance for systematic reviewers in the medical and health sciences. *BMC Med Res Methodol*. 2018;18(1):5. doi:10.1186/s12874-017-0468-4
29. Steyerberg EW, Vickers AJ, Cook NR, et al. Assessing the performance of prediction models: a framework for traditional and novel measures. *Epidemiology*. 2010;21(1):128-138. doi:10.1097/EDE.0b013e3181c30fb2
30. Rudin C. Stop Explaining Black Box Machine Learning Models for High Stakes Decisions and Use Interpretable Models Instead. *Nat Mach Intell*. 2019;1(5):206-215. doi:10.1038/s42256-019-0048-x
31. *Covidence Systematic Review Software, Veritas Health Innovation, Melbourne, Australia. Available at [Www.Covidence.Org](http://www.Covidence.Org).*
32. Haidich AB. Meta-analysis in medical research. *Hippokratia*. 2010;14(Suppl 1):29-37.
33. Lash TL, Fox MP, MacLehose RF, Maldonado G, McCandless LC, Greenland S. Good practices for quantitative bias analysis. *Int J Epidemiol*. 2014;43(6):1969-1985. doi:10.1093/ije/dyu149
34. Filippou CD, Tsioufis CP, Thomopoulos CG, et al. Dietary Approaches to Stop Hypertension (DASH) Diet and Blood Pressure Reduction in Adults with and without Hypertension: A Systematic Review and Meta-Analysis of Randomized Controlled Trials. *Adv Nutr*. 2020;11(5):1150-1160. doi:10.1093/advances/nmaa041
35. Shor E, Roelfs D, Vang ZM. The "Hispanic mortality paradox" revisited: Meta-analysis and meta-regression of life-course differentials in Latin American and Caribbean immigrants' mortality. *Social Science & Medicine*. 2017;186:20-33. doi:10.1016/j.socscimed.2017.05.049
36. Yuan W, Wu B, Lou M, et al. Identification of Risk Factors for Stroke in China: A Meta-Analysis of Prospective Cohort Studies. *Frontiers in Neurology*. 2022;13 doi:10.3389/fneur.2022.847304
37. Zheng YL, Lian F, Shi Q, et al. Alcohol intake and associated risk of major cardiovascular outcomes in women compared with men: a systematic review

- and meta-analysis of prospective observational studies. *BMC Public Health*. 2015;15:773. doi:10.1186/s12889-015-2081-y
38. Zhang X, Shu L, Si C, et al. Dietary Patterns and Risk of Stroke in Adults: A Systematic Review and Meta-analysis of Prospective Cohort Studies. *J Stroke Cerebrovasc Dis*. 2015;24(10):2173-2182. doi:10.1016/j.jstrokecerebrovasdis.2015.05.035
  39. Ronksley PE, Brien SE, Turner BJ, Mukamal KJ, Ghali WA. Association of alcohol consumption with selected cardiovascular disease outcomes: a systematic review and meta-analysis. *BMJ*. 2011;342:d671. doi:10.1136/bmj.d671
  40. Reynolds K, Lewis B, Nolen JD, Kinney GL, Sathya B, He J. Alcohol consumption and risk of stroke: a meta-analysis. *JAMA*. 2003;289(5):579-588. doi:10.1001/jama.289.5.579
  41. Xu W, Wang H, Wan Y, et al. Alcohol consumption and dementia risk: a dose-response meta-analysis of prospective studies. *Eur J Epidemiol*. 2017;32(1):31-42. doi:10.1007/s10654-017-0225-3
  42. Anstey KJ, Mack HA, Cherbuin N. Alcohol consumption as a risk factor for dementia and cognitive decline: meta-analysis of prospective studies. *Am J Geriatr Psychiatry*. 2009;17(7):542-555. doi:10.1097/JGP.0b013e3181a2fd07
  43. Wang J, Wen X, Li W, Li X, Wang Y, Lu W. Risk Factors for Stroke in the Chinese Population: A Systematic Review and Meta-Analysis. *J Stroke Cerebrovasc Dis*. 2017;26(3):509-517. doi:10.1016/j.jstrokecerebrovasdis.2016.12.002
  44. Lee M, Saver JL, Chang B, Chang KH, Hao Q, Ovbiagele B. Presence of baseline prehypertension and risk of incident stroke: a meta-analysis. *Neurology*. 2011;77(14):1330-1337. doi:10.1212/WNL.0b013e3182315234
  45. Huang Y, Cai X, Li Y, et al. Prehypertension and the risk of stroke: a meta-analysis. *Neurology*. 2014;82(13):1153-1161. doi:10.1212/WNL.0000000000000268
  46. Han M, Li Q, Liu L, et al. Prehypertension and risk of cardiovascular diseases: A meta-Analysis of 47 cohort studies. *Journal of Hypertension*. 2019;37(12):2325-2332. doi:10.1097/HJH.0000000000002191
  47. Birhanu MM, Zaman SB, Thrift AG, Evans RG, Zengin A. Risk factors for incident cardiovascular events among adults in low- and middle-income countries: A systematic review and meta-analysis of prospective cohort studies. *Prev Med*. 2022;158:107036. doi:10.1016/j.ypmed.2022.107036
  48. Wu Y, Xiong Y, Wang P, et al. Risk factors of cardiovascular and cerebrovascular diseases in young and middle-aged adults: A meta-analysis. *Medicine (Baltimore)*. 2022;101(48):e32082. doi:10.1097/MD.00000000000032082

49. Ou YN, Tan CC, Shen XN, et al. Blood Pressure and Risks of Cognitive Impairment and Dementia: A Systematic Review and Meta-Analysis of 209 Prospective Studies. *Hypertension*. 2020;76(1):217-225. doi:10.1161/HYPERTENSIONAHA.120.14993
50. Li XY, Zhang M, Xu W, et al. Midlife Modifiable Risk Factors for Dementia: A Systematic Review and Meta-analysis of 34 Prospective Cohort Studies. *Curr Alzheimer Res*. 2019;16(14):1254-1268. doi:10.2174/1567205017666200103111253
51. Wu J, Xiong Y, Xia X, et al. Can dementia risk be reduced by following the American Heart Association's Life's Simple 7? A systematic review and dose-response meta-analysis. *Ageing Res Rev*. 2023;83:101788. doi:10.1016/j.arr.2022.101788
52. Lennon MJ, Lam BCP, Lipnicki DM, et al. Use of Antihypertensives, Blood Pressure, and Estimated Risk of Dementia in Late Life: An Individual Participant Data Meta-Analysis. *JAMA Netw Open*. 2023;6(9):e2333353. doi:10.1001/jamanetworkopen.2023.33353
53. Strazzullo P, D'Elia L, Cairella G, Garbagnati F, Cappuccio FP, Scalfi L. Excess body weight and incidence of stroke: meta-analysis of prospective studies with 2 million participants. *Stroke*. 2010;41(5):e418-26. doi:10.1161/STROKEAHA.109.576967
54. Riaz H, Khan MS, Siddiqi TJ, et al. Association Between Obesity and Cardiovascular Outcomes: A Systematic Review and Meta-analysis of Mendelian Randomization Studies. *JAMA Netw Open*. 2018;1(7):e183788. doi:10.1001/jamanetworkopen.2018.3788
55. Anstey KJ, Cherbuin N, Budge M, Young J. Body mass index in midlife and late-life as a risk factor for dementia: a meta-analysis of prospective studies. *Obes Rev*. 2011;12(5):e426-37. doi:10.1111/j.1467-789X.2010.00825.x
56. Ford E, Greenslade N, Paudyal P, et al. Predicting dementia from primary care records: A systematic review and meta-analysis. *PLoS One*. 2018;13(3):e0194735. doi:10.1371/journal.pone.0194735
57. Qu Y, Hu HY, Ou YN, et al. Association of body mass index with risk of cognitive impairment and dementia: A systematic review and meta-analysis of prospective studies. *Neurosci Biobehav Rev*. 2020;115:189-198. doi:10.1016/j.neubiorev.2020.05.012
58. Pedditzi E, Peters R, Beckett N. The risk of overweight/obesity in mid-life and late life for the development of dementia: a systematic review and meta-analysis of longitudinal studies. *Age Ageing*. 2016;45(1):14-21. doi:10.1093/ageing/afv151
59. Loef M, Walach H. Midlife obesity and dementia: meta-analysis and adjusted forecast of dementia prevalence in the United States and China. *Obesity (Silver Spring)*. 2013;21(1):E51-5. doi:10.1002/oby.20037

60. Danat IM, Clifford A, Partridge M, et al. Impacts of Overweight and Obesity in Older Age on the Risk of Dementia: A Systematic Literature Review and a Meta-Analysis. *J Alzheimers Dis.* 2019;70(s1):S87-S99. doi:10.3233/JAD-180763
61. Beydoun MA, Beydoun HA, Wang Y. Obesity and central obesity as risk factors for incident dementia and its subtypes: a systematic review and meta-analysis. *Obes Rev.* 2008;9(3):204-218. doi:10.1111/j.1467-789X.2008.00473.x
62. Rahmani J, Roudsari AH, Bawadi H, et al. Body mass index and risk of Parkinson, Alzheimer, Dementia, and Dementia mortality: a systematic review and dose-response meta-analysis of cohort studies among 5 million participants. *Nutr Neurosci.* 2022;25(3):423-431. doi:10.1080/1028415X.2020.1758888
63. Shi H, Ge Y, Wang H, Zhang Y, Teng W, Tian L. Fasting blood glucose and risk of Stroke: A Dose-Response meta-analysis. *Clin Nutr.* 2021;40(5):3296-3304. doi:10.1016/j.clnu.2020.10.054
64. Lee M, Saver JL, Hong KS, Song S, Chang KH, Ovbiagele B. Effect of pre-diabetes on future risk of stroke: meta-analysis. *BMJ.* 2012;344:e3564. doi:10.1136/bmj.e3564
65. Liao HW, Saver J, Yeh HC, et al. Low fasting glucose and future risks of major adverse outcomes in people without baseline diabetes or cardiovascular disease: a systematic review and meta-analysis. *BMJ Open.* 2019;9(7):e026010. doi:10.1136/bmjopen-2018-026010
66. Xue M, Xu W, Ou YN, et al. Diabetes mellitus and risks of cognitive impairment and dementia: A systematic review and meta-analysis of 144 prospective studies. *Ageing Res Rev.* 2019;55:100944. doi:10.1016/j.arr.2019.100944
67. Banach M, Shekoohi N, Mikhailidis DP, Lip GYH, Hernandez AV, Mazidi M. Relationship between low-density lipoprotein cholesterol, lipid-lowering agents and risk of stroke: a meta-analysis of observational studies (n = 355,591) and randomized controlled trials (n = 165,988). *Archives of Medical Science.* 2022;18(4):912-929. doi:10.5114/aoms/145970
68. Qie R, Liu L, Zhang D, et al. Dose-Response Association Between High-Density Lipoprotein Cholesterol and Stroke: A Systematic Review and Meta-Analysis of Prospective Cohort Studies. *Prev Chronic Dis.* 2021;18:E45. doi:10.5888/pcd18.200278
69. Peters SA, Singhatheh Y, Mackay D, Huxley RR, Woodward M. Total cholesterol as a risk factor for coronary heart disease and stroke in women compared with men: A systematic review and meta-analysis. *Atherosclerosis.* 2016;248:123-131. doi:10.1016/j.atherosclerosis.2016.03.016
70. Liu Y, Jin X, Fu K, et al. Non-traditional lipid profiles and the risk of stroke: A systematic review and meta-analysis. *Nutr Metab Cardiovasc Dis.* 2023;33(4):698-714. doi:10.1016/j.numecd.2023.01.003



71. Wang P, Sun J, Xie T, Lv S. Serum non-high-density lipoprotein cholesterol and risk of stroke in the general population: A meta-analysis. *International Journal of Clinical and Experimental Medicine*. 2018;11(3):1467-1474.
72. Zhu Y, Liu X, Zhu R, Zhao J, Wang Q. Lipid levels and the risk of dementia: A dose-response meta-analysis of prospective cohort studies. *Ann Clin Transl Neurol*. 2022;9(3):296-311. doi:10.1002/acn3.51516
73. Anstey KJ, Ashby-Mitchell K, Peters R. Updating the Evidence on the Association between Serum Cholesterol and Risk of Late-Life Dementia: Review and Meta-Analysis. *J Alzheimers Dis*. 2017;56(1):215-228. doi:10.3233/JAD-160826
74. Valkanova V, Ebmeier KP. Vascular risk factors and depression in later life: a systematic review and meta-analysis. *Biol Psychiatry*. 2013;73(5):406-413. doi:10.1016/j.biopsych.2012.10.028
75. Yates LA, Ziser S, Spector A, Orrell M. Cognitive leisure activities and future risk of cognitive impairment and dementia: systematic review and meta-analysis. *Int Psychogeriatr*. 2016;28(11):1791-1806. doi:10.1017/S1041610216001137
76. Eurelings LSM, van Dalen JW, Ter Riet G, et al. Apathy and depressive symptoms in older people and incident myocardial infarction, stroke, and mortality: A systematic review and meta-analysis of individual participant data. *Clinical Epidemiology*. 2018;10. doi:10.2147/CLEP.S150915
77. Hu D, Huang J, Wang Y, Zhang D, Qu Y. Fruits and vegetables consumption and risk of stroke: a meta-analysis of prospective cohort studies. *Stroke*. 2014;45(6):1613-1619. doi:10.1161/STROKEAHA.114.004836
78. Bechthold A, Boeing H, Schwedhelm C, et al. Food groups and risk of coronary heart disease, stroke and heart failure: A systematic review and dose-response meta-analysis of prospective studies. *Crit Rev Food Sci Nutr*. 2019;59(7):1071-1090. doi:10.1080/10408398.2017.1392288
79. Hu H, Zhao Y, Feng Y, et al. Consumption of whole grains and refined grains and associated risk of cardiovascular disease events and all-cause mortality: a systematic review and dose-response meta-analysis of prospective cohort studies. *Am J Clin Nutr*. 2023;117(1):149-159. doi:10.1016/j.ajcnut.2022.10.010
80. Papp RE, Hasenegger V, Ekmekcioglu C, Schwingshackl L. Association of poultry consumption with cardiovascular diseases and all-cause mortality: a systematic review and dose response meta-analysis of prospective cohort studies. *Crit Rev Food Sci Nutr*. 2023;63(15):2366-2387. doi:10.1080/10408398.2021.1975092
81. Mendes V, Niforou A, Kasdagli MI, Ververis E, Naska A. Intake of legumes and cardiovascular disease: A systematic review and dose-response meta-analysis. *Nutr Metab Cardiovasc Dis*. 2023;33(1):22-37. doi:10.1016/j.numecd.2022.10.006

82. Shao C, Tang H, Zhao W, He J. Nut intake and stroke risk: A dose-response meta-analysis of prospective cohort studies. *Sci Rep.* 2016;6:30394. doi:10.1038/srep30394
83. Wang Y, Zhao R, Wang B, Zhao C, Zhu B, Tian X. The Dose-Response Associations of Sugar-Sweetened Beverage Intake with the Risk of Stroke, Depression, Cancer, and Cause-Specific Mortality: A Systematic Review and Meta-Analysis of Prospective Studies. *Nutrients.* 2022;14(4). doi:10.3390/nu14040777
84. Rossi M, Turati F, Lagiou P, Trichopoulos D, La Vecchia C, Trichopoulou A. Relation of dietary glycemic load with ischemic and hemorrhagic stroke: a cohort study in Greece and a meta-analysis. *Eur J Nutr.* 2015;54(2):215-222. doi:10.1007/s00394-014-0702-3
85. Strazzullo P, D'Elia L, Kandala NB, Cappuccio FP. Salt intake, stroke, and cardiovascular disease: meta-analysis of prospective studies. *BMJ.* 2009;339:b4567. doi:10.1136/bmj.b4567
86. Kang ZQ, Yang Y, Xiao B. Dietary saturated fat intake and risk of stroke: Systematic review and dose-response meta-analysis of prospective cohort studies. *Nutr Metab Cardiovasc Dis.* 2020;30(2):179-189. doi:10.1016/j.numecd.2019.09.028
87. Zhang XW, Yang Z, Li M, Li K, Deng YQ, Tang ZY. Association between dietary protein intake and risk of stroke: A meta-analysis of prospective studies. *Int J Cardiol.* 2016;223:548-551. doi:10.1016/j.ijcard.2016.08.106
88. Talebi S, Asoudeh F, Naeini F, Sadeghi E, Travica N, Mohammadi H. Association between animal protein sources and risk of neurodegenerative diseases: a systematic review and dose-response meta-analysis. *Nutr Rev.* 2023;81(9):1131-1143. doi:10.1093/nutrit/nuac114
89. Bakre AT, Chen R, Khutan R, et al. Association between fish consumption and risk of dementia: a new study from China and a systematic literature review and meta-analysis. *Public Health Nutr.* 2018;21(10):1921-1932. doi:10.1017/S136898001800037X
90. Zhu RZ, Chen MQ, Zhang ZW, Wu TY, Zhao WH. Dietary fatty acids and risk for Alzheimer's disease, dementia, and mild cognitive impairment: A prospective cohort meta-analysis. *Nutrition.* 2021;90:111355. doi:10.1016/j.nut.2021.111355
91. Sun Q, Yang Y, Wang X, Yang R, Li X. The Association between Sugar-Sweetened Beverages and Cognitive Function in Middle-Aged and Older People: A Meta-Analysis. *Journal of Prevention of Alzheimer's Disease.* 2022;9(2):323-330. doi:10.14283/jpad.2021.71
92. Khosravipour M, Rajati F. Sensorineural hearing loss and risk of stroke: a systematic review and meta-analysis. *Sci Rep.* 2021;11(1):11021. doi:10.1038/s41598-021-89695-2

93. Liang Z, Li A, Xu Y, Qian X, Gao X. Hearing Loss and Dementia: A Meta-Analysis of Prospective Cohort Studies. *Frontiers in Aging Neuroscience*. 2021;13. doi:10.3389/fnagi.2021.695117
94. Lawrence BJ, Jayakody DMP, Bennett RJ, Eikelboom RH, Gasson N, Friedland PL. Hearing Loss and Depression in Older Adults: A Systematic Review and Meta-analysis. *Gerontologist*. 2020;60(3):e137-e154. doi:10.1093/geront/gnz009
95. Lee M, Saver JL, Chang KH, Liao HW, Chang SC, Ovbiagele B. Low glomerular filtration rate and risk of stroke: meta-analysis. *BMJ*. 2010;341:c4249. doi:10.1136/bmj.c4249
96. Masson P, Webster AC, Hong M, Turner R, Lindley RI, Craig JC. Chronic kidney disease and the risk of stroke: a systematic review and meta-analysis. *Nephrol Dial Transplant*. 2015;30(7):1162-1169. doi:10.1093/ndt/gfv009
97. Kjaergaard AD, Ellervik C, Witte DR, Nordestgaard BG, Frikke-Schmidt R, Bojesen SE. Kidney function and risk of dementia: Observational study, meta-analysis, and two-sample mendelian randomization study. *Eur J Epidemiol*. 2022;37(12):1273-1284. doi:10.1007/s10654-022-00923-z
98. Yuan H, Ahmed WL, Liu M, Tu S, Zhou F, Wang S. Contribution of pain to subsequent cognitive decline or dementia: A systematic review and meta-analysis of cohort studies. *Int J Nurs Stud*. 2023;138:104409. doi:10.1016/j.ijnurstu.2022.104409
99. Wendel-Vos GC, Schuit AJ, Feskens EJ, et al. Physical activity and stroke. A meta-analysis of observational data. *Int J Epidemiol*. 2004;33(4):787-798. doi:10.1093/ije/dyh168
100. Lee CD, Folsom AR, Blair SN. Physical activity and stroke risk: a meta-analysis. *Stroke*. 2003;34(10):2475-2481. doi:10.1161/01.STR.0000091843.02517.9D
101. Kivimäki M, Singh-Manoux A, Pentti J, et al. Physical inactivity, cardiometabolic disease, and risk of dementia: an individual-participant meta-analysis. *BMJ*. 2019;365:l1495. doi:10.1136/bmj.l1495
102. Xu W, Wang HF, Wan Y, Tan CC, Yu JT, Tan L. Leisure time physical activity and dementia risk: a dose-response meta-analysis of prospective studies. *BMJ Open*. 2017;7(10):e014706. doi:10.1136/bmjopen-2016-014706
103. Iso-Markku P, Kujala UM, Knittle K, Polet J, Vuoksima E, Waller K. Physical activity as a protective factor for dementia and Alzheimer's disease: systematic review, meta-analysis and quality assessment of cohort and case-control studies. *Br J Sports Med*. 2022;56(12):701-709. doi:10.1136/bjsports-2021-104981
104. de Souto Barreto P, Demougeot L, Vellas B, Rolland Y. Exercise Training for Preventing Dementia, Mild Cognitive Impairment, and Clinically Meaningful Cognitive Decline: A Systematic Review and Meta-analysis. *J Gerontol A Biol Sci Med Sci*. 2018;73(11):1504-1511. doi:10.1093/gerona/glx234

105. Lee J. The Relationship Between Physical Activity and Dementia: A Systematic Review and Meta-Analysis of Prospective Cohort Studies. *J Gerontol Nurs.* 2018;44(10):22-29. doi:10.3928/00989134-20180814-01
106. Guure CB, Ibrahim NA, Adam MB, Said SM. Impact of Physical Activity on Cognitive Decline, Dementia, and Its Subtypes: Meta-Analysis of Prospective Studies. *Biomed Res Int.* 2017;2017:9016924. doi:10.1155/2017/9016924
107. Sutin DAR, Luchetti M, Aschwanden D, Stephan Y, Sesker AA, Terracciano A. Sense of meaning and purpose in life and risk of incident dementia: New data and meta-analysis. *Arch Gerontol Geriatr.* 2023;105:104847. doi:10.1016/j.archger.2022.104847
108. Bell G, Singham T, Saunders R, John A, Stott J. Positive psychological constructs and association with reduced risk of mild cognitive impairment and dementia in older adults: A systematic review and meta-analysis. *Ageing Res Rev.* 2022;77:101594. doi:10.1016/j.arr.2022.101594
109. Sutin AR, Aschwanden D, Luchetti M, Stephan Y, Terracciano A. Sense of Purpose in Life Is Associated with Lower Risk of Incident Dementia: A Meta-Analysis. *J Alzheimers Dis.* 2021;83(1):249-258. doi:10.3233/JAD-210364
110. Wu TT, Zou YL, Xu KD, et al. Insomnia and multiple health outcomes: umbrella review of meta-analyses of prospective cohort studies. *Public Health.* 2023;215. doi:10.1016/j.puhe.2022.11.021
111. Wang H, Sun J, Sun M, Liu N, Wang M. Relationship of sleep duration with the risk of stroke incidence and stroke mortality: an updated systematic review and dose-response meta-analysis of prospective cohort studies. *Sleep Med.* 2022;90:267-278. doi:10.1016/j.sleep.2021.11.001
112. Li W, Wang D, Cao S, et al. Sleep duration and risk of stroke events and stroke mortality: A systematic review and meta-analysis of prospective cohort studies. *Int J Cardiol.* 2016;223:870-876. doi:10.1016/j.ijcard.2016.08.302
113. Leng Y, Cappuccio FP, Wainwright NW, et al. Sleep duration and risk of fatal and nonfatal stroke: a prospective study and meta-analysis. *Neurology.* 2015;84(11):1072-1079. doi:10.1212/WNL.0000000000001371
114. Jike M, Itani O, Watanabe N, Buysse DJ, Kaneita Y. Long sleep duration and health outcomes: A systematic review, meta-analysis and meta-regression. *Sleep Med Rev.* 2018;39:25-36. doi:10.1016/j.smrv.2017.06.011
115. He Q, Sun H, Wu X, et al. Sleep duration and risk of stroke: a dose-response meta-analysis of prospective cohort studies. *Sleep Med.* 2017;32:66-74. doi:10.1016/j.sleep.2016.12.012
116. Cappuccio FP, Cooper D, D'Elia L, Strazzullo P, Miller MA. Sleep duration predicts cardiovascular outcomes: a systematic review and meta-analysis of prospective studies. *Eur Heart J.* 2011;32(12):1484-1492. doi:10.1093/eurheartj/ehr007

117. Ge B, Guo X. Short and long sleep durations are both associated with increased risk of stroke: a meta-analysis of observational studies. *Int J Stroke*. 2015;10(2):177-184. doi:10.1111/ijvs.12398
118. Fan L, Xu W, Cai Y, Hu Y, Wu C. Sleep Duration and the Risk of Dementia: A Systematic Review and Meta-analysis of Prospective Cohort Studies. *J Am Med Dir Assoc*. 2019;20(12):1480-1487.e5. doi:10.1016/j.jamda.2019.06.009
119. de Almondes KM, Costa MV, Malloy-Diniz LF, Diniz BS. Insomnia and risk of dementia in older adults: Systematic review and meta-analysis. *J Psychiatr Res*. 2016;77:109-115. doi:10.1016/j.jpsychires.2016.02.021
120. Shi L, Chen SJ, Ma MY, et al. Sleep disturbances increase the risk of dementia: A systematic review and meta-analysis. *Sleep Med Rev*. 2018;40:4-16. doi:10.1016/j.smr.2017.06.010
121. Bao YP, Han Y, Ma J, et al. Cooccurrence and bidirectional prediction of sleep disturbances and depression in older adults: Meta-analysis and systematic review. *Neurosci Biobehav Rev*. 2017;75:257-273. doi:10.1016/j.neubiorev.2017.01.032
122. Hill Almeida LM, Flicker L, Hankey GJ, Golledge J, Yeap BB, Almeida OP. Disrupted sleep and risk of depression in later life: A prospective cohort study with extended follow up and a systematic review and meta-analysis. *Journal of Affective Disorders*. 2022;309. doi:10.1016/j.jad.2022.04.133
123. Shinton R, Beevers G. Meta-analysis of relation between cigarette smoking and stroke. *British Medical Journal*. 1989;298(6676):789-794. doi:10.1136/bmj.298.6676.789
124. Peters SA, Huxley RR, Woodward M. Smoking as a risk factor for stroke in women compared with men: a systematic review and meta-analysis of 81 cohorts, including 3,980,359 individuals and 42,401 strokes. *Stroke*. 2013;44(10):2821-2828. doi:10.1161/STROKEAHA.113.002342
125. Pan B, Jin X, Jun L, Qiu S, Zheng Q, Pan M. The relationship between smoking and stroke: A meta-analysis. *Medicine (Baltimore)*. 2019;98(12):e14872. doi:10.1097/MD.00000000000014872
126. Mons U, Müezzinler A, Gellert C, et al. Impact of smoking and smoking cessation on cardiovascular events and mortality among older adults: meta-analysis of individual participant data from prospective cohort studies of the CHANCES consortium. *BMJ*. 2015;350:h1551. doi:10.1136/bmj.h1551
127. Cao L, Tan L, Wang HF, et al. Dietary Patterns and Risk of Dementia: a Systematic Review and Meta-Analysis of Cohort Studies. *Mol Neurobiol*. 2016;53(9):6144-6154. doi:10.1007/s12035-015-9516-4
128. Zhong G, Wang Y, Zhang Y, Guo JJ, Zhao Y. Smoking is associated with an increased risk of dementia: a meta-analysis of prospective cohort studies with investigation of potential effect modifiers. *PLoS One*. 2015;10(3):e0118333. doi:10.1371/journal.pone.0118333

129. Anstey KJ, von Sanden C, Salim A, O’Kearney R. Smoking as a risk factor for dementia and cognitive decline: a meta-analysis of prospective studies. *Am J Epidemiol.* 2007;166(4):367-378. doi:10.1093/aje/kwm116
130. Valtorta NK, Kanaan M, Gilbody S, Ronzi S, Hanratty B. Loneliness and social isolation as risk factors for coronary heart disease and stroke: Systematic review and meta-analysis of longitudinal observational studies. *Heart.* 2016;102(13):1009-1016. doi:10.1136/heartjnl-2015-308790
131. Park JW, Mealy R, Saldanha IJ, et al. Multilevel resilience resources and cardiovascular disease in the United States: A systematic review and meta-analysis. *Health Psychology.* 2022;41(4):278-290. doi:10.1037/hea0001069
132. Sommerlad A, Rieger J, Singh-Manoux A, Lewis G, Livingston G. Marriage and risk of dementia: systematic review and meta-analysis of observational studies. *J Neurol Neurosurg Psychiatry.* 2018;89(3):231-238. doi:10.1136/jnnp-2017-316274
133. Qiao L, Wang G, Tang Z, et al. Association between loneliness and dementia risk: A systematic review and meta-analysis of cohort studies. *Frontiers in Human Neuroscience.* 2022;16. doi:10.3389/fnhum.2022.899814
134. Kuiper JS, Zuidersma M, Oude Voshaar RC, et al. Social relationships and risk of dementia: A systematic review and meta-analysis of longitudinal cohort studies. *Ageing Res Rev.* 2015;22:39-57. doi:10.1016/j.arr.2015.04.006
135. Desai R, John A, Stott J, Charlesworth G. Living alone and risk of dementia: A systematic review and meta-analysis. *Ageing Res Rev.* 2020;62:101122. doi:10.1016/j.arr.2020.101122
136. Wang S, Molassiotis A, Guo C, Leung ISH, Leung AYM. Association between social integration and risk of dementia: A systematic review and meta-analysis of longitudinal studies. *J Am Geriatr Soc.* 2023;71(2):632-645. doi:10.1111/jgs.18094
137. Booth J, Connelly L, Lawrence M, et al. Evidence of perceived psychosocial stress as a risk factor for stroke in adults: A meta-analysis. *BMC Neurology.* 2015;15(1). doi:10.1186/s12883-015-0456-4
138. Franks KH, Bransby L, Saling MM, Pase MP. Association of Stress with Risk of Dementia and Mild Cognitive Impairment: A Systematic Review and Meta-Analysis. *J Alzheimers Dis.* 2021;82(4):1573-1590. doi:10.3233/JAD-210094
139. O’Donnell MJ, Chin SL, Rangarajan S, et al. Global and regional effects of potentially modifiable risk factors associated with acute stroke in 32 countries (INTERSTROKE): a case-control study. *Lancet.* 2016;388(10046):761-775. doi:10.1016/S0140-6736(16)30506-2
140. Seattle, United States: Institute for Health Metrics and Evaluation (IHME). Global Burden of Disease Study 2019 (GBD 2019). Global Burden of Disease Collaborative Network.

141. Hackam DG, Hegele RA. Cholesterol Lowering and Prevention of Stroke. *Stroke*. 2019;50(2):537-541. doi:10.1161/STROKEAHA.118.023167
142. Floud S, Balkwill A, Reeves GK, Peto R, Beral V. Cognitive and social activities and long-term dementia risk – Authors’ reply. *The Lancet Public Health*. 2021;6(5):e270. doi:10.1016/S2468-2667(21)00072-4
143. Mirmiran P, Bahadoran Z, Gaeini Z. Common Limitations and Challenges of Dietary Clinical Trials for Translation into Clinical Practices. *Int J Endocrinol Metab*. 2021;19(3):e108170. doi:10.5812/ijem.108170
144. Buxton OM, Marcelli E. Short and long sleep are positively associated with obesity, diabetes, hypertension, and cardiovascular disease among adults in the United States. *Soc Sci Med*. 2010;71(5):1027-1036. doi:10.1016/j.socscimed.2010.05.041
145. Salehi-Abargouei A, Maghsoudi Z, Shirani F, Azadbakht L. Effects of Dietary Approaches to Stop Hypertension (DASH)-style diet on fatal or nonfatal cardiovascular diseases--incidence: a systematic review and meta-analysis on observational prospective studies. *Nutrition*. 2013;29(4):611-618. doi:10.1016/j.nut.2012.12.018
146. Achterberg W, Lautenbacher S, Husebo B, Erdal A, Herr K. Pain in dementia. *Pain Rep*. 2020;5(1):e803. doi:10.1097/PR9.0000000000000803
147. Thomas AJ, Kalaria RN, O’Brien JT. Depression and vascular disease: what is the relationship? *J Affect Disord*. 2004;79(1-3):81-95. doi:10.1016/S0165-0327(02)00349-X
148. Shimbo D, Chaplin W, Crossman D, Haas D, Davidson KW. Role of depression and inflammation in incident coronary heart disease events. *Am J Cardiol*. 2005;96(7):1016-1021. doi:10.1016/j.amjcard.2005.05.064
149. Strine TW, Mokdad AH, Dube SR, et al. The association of depression and anxiety with obesity and unhealthy behaviors among community-dwelling US adults. *Gen Hosp Psychiatry*. 2008;30(2):127-137. doi:10.1016/j.genhosppsych.2007.12.008
150. Wijeratne T, Sales C. Understanding Why Post-Stroke Depression May Be the Norm Rather Than the Exception: The Anatomical and Neuroinflammatory Correlates of Post-Stroke Depression. *J Clin Med*. 2021;10(8). doi:10.3390/jcm10081674
151. Muliayala KP, Varghese M. The complex relationship between depression and dementia. *Ann Indian Acad Neurol*. 2010;13(Suppl 2):S69-73. doi:10.4103/0972-2327.74248
152. Aziz R, Steffens DC. What are the causes of late-life depression? *Psychiatr Clin North Am*. 2013;36(4):497-516. doi:10.1016/j.psc.2013.08.001

153. Farhat NS, Theiss R, Santini T, Ibrahim TS, Aizenstein HJ. Neuroimaging of Small Vessel Disease in Late-Life Depression. *Adv Exp Med Biol*. 2019;1192:95-115. doi:10.1007/978-981-32-9721-0\_5
154. Diaz KM, Shimbo D. Physical activity and the prevention of hypertension. *Curr Hypertens Rep*. 2013;15(6):659-668. doi:10.1007/s11906-013-0386-8
155. Sattar N, Preiss D. Reverse Causality in Cardiovascular Epidemiological Research: More Common Than Imagined? *Circulation*. 2017;135(24):2369-2372. doi:10.1161/CIRCULATIONAHA.117.028307
156. Hasson F, Keeney S, McKenna H. Research guidelines for the Delphi survey technique. *J Adv Nurs*. 2000;32(4):1008-1015.
157. Zhang C, Qin YY, Chen Q, et al. Alcohol intake and risk of stroke: a dose-response meta-analysis of prospective studies. *Int J Cardiol*. 2014;174(3):669-677. doi:10.1016/j.ijcard.2014.04.225
158. Long J, Duan G, Tian W, et al. Hypertension and risk of depression in the elderly: a meta-analysis of prospective cohort studies. *J Hum Hypertens*. 2015;29(8):478-482. doi:10.1038/jhh.2014.112
159. Wang X, Su W, Huang Y, et al. BMI and risk of stroke: a dose-response meta-analysis. *Chinese Journal of Evidence-Based Medicine*. 2022;22(11):1330-1338. doi:10.7507/1672-2531.202205032



## Figures and tables

**Figure 1: Study Design**

|     | Methodology                                            | Objective                                                                          |
|-----|--------------------------------------------------------|------------------------------------------------------------------------------------|
| I   | Systematic review of risk models                       | To identify overlapping risk factors for stroke, dementia and late-life depression |
| II  | Systematic review of meta-analysis                     | To obtain effect sizes of risk factors for each of the three diseases              |
| III | Selection of the most relevant available meta-analysis | To obtain most relevant effect sizes                                               |
| IV  | Calculation of DALY weighted effect sizes              | To obtain relative impact of each risk factor on age-related drain disease         |

**Figure 2:** Prisma flowchart of the systematic review of meta-analyses.

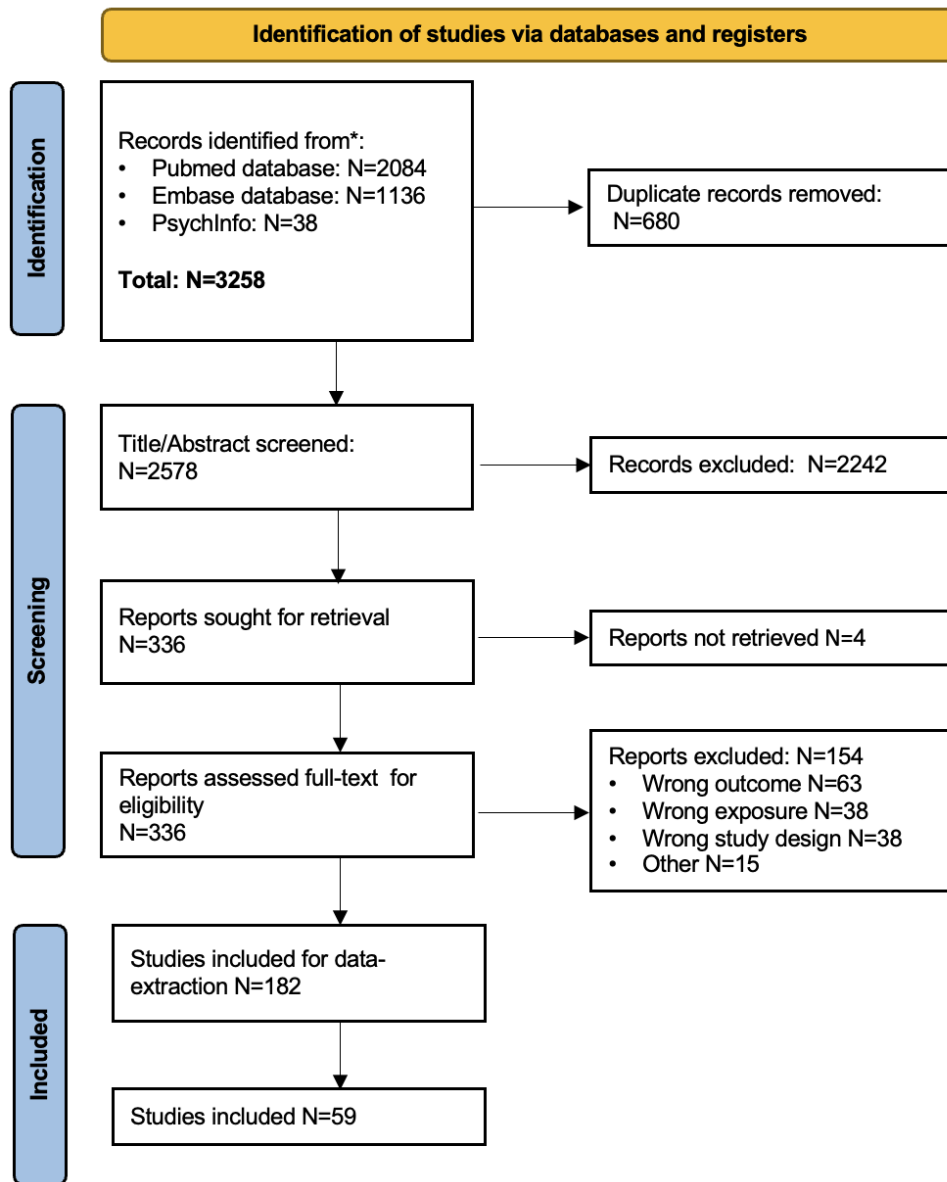

**Figure 3:** Effect sizes for stroke, dementia, LLD and a composite outcome.

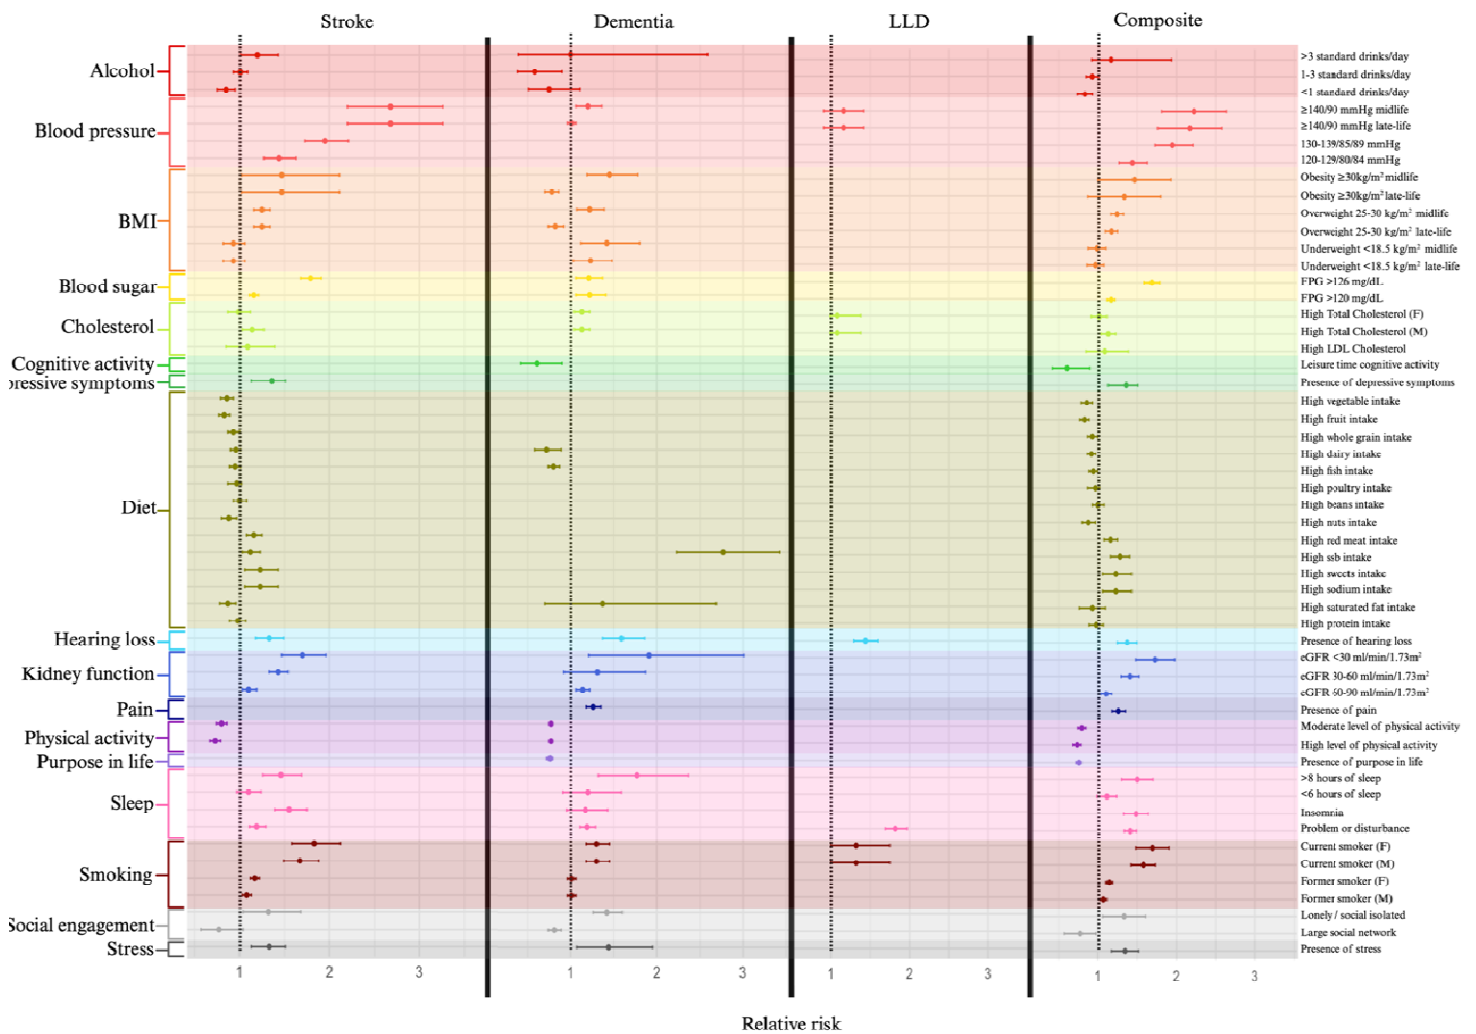

Abbreviations: BMI: body mass index, dL: deciliter, eGFR: estimated glomerular filtration rate, F: female, FPG: fasting plasma glucose, KG: kilograms, LLD: late-life depression, LDL: low density lipoprotein, M: male, m: meters, mg: milligram, min: minutes, mmHg: millimeters mercury. SSB: sugar sweetened beverages.

**Figure 4:** Normalized beta-coefficients for a composite outcome

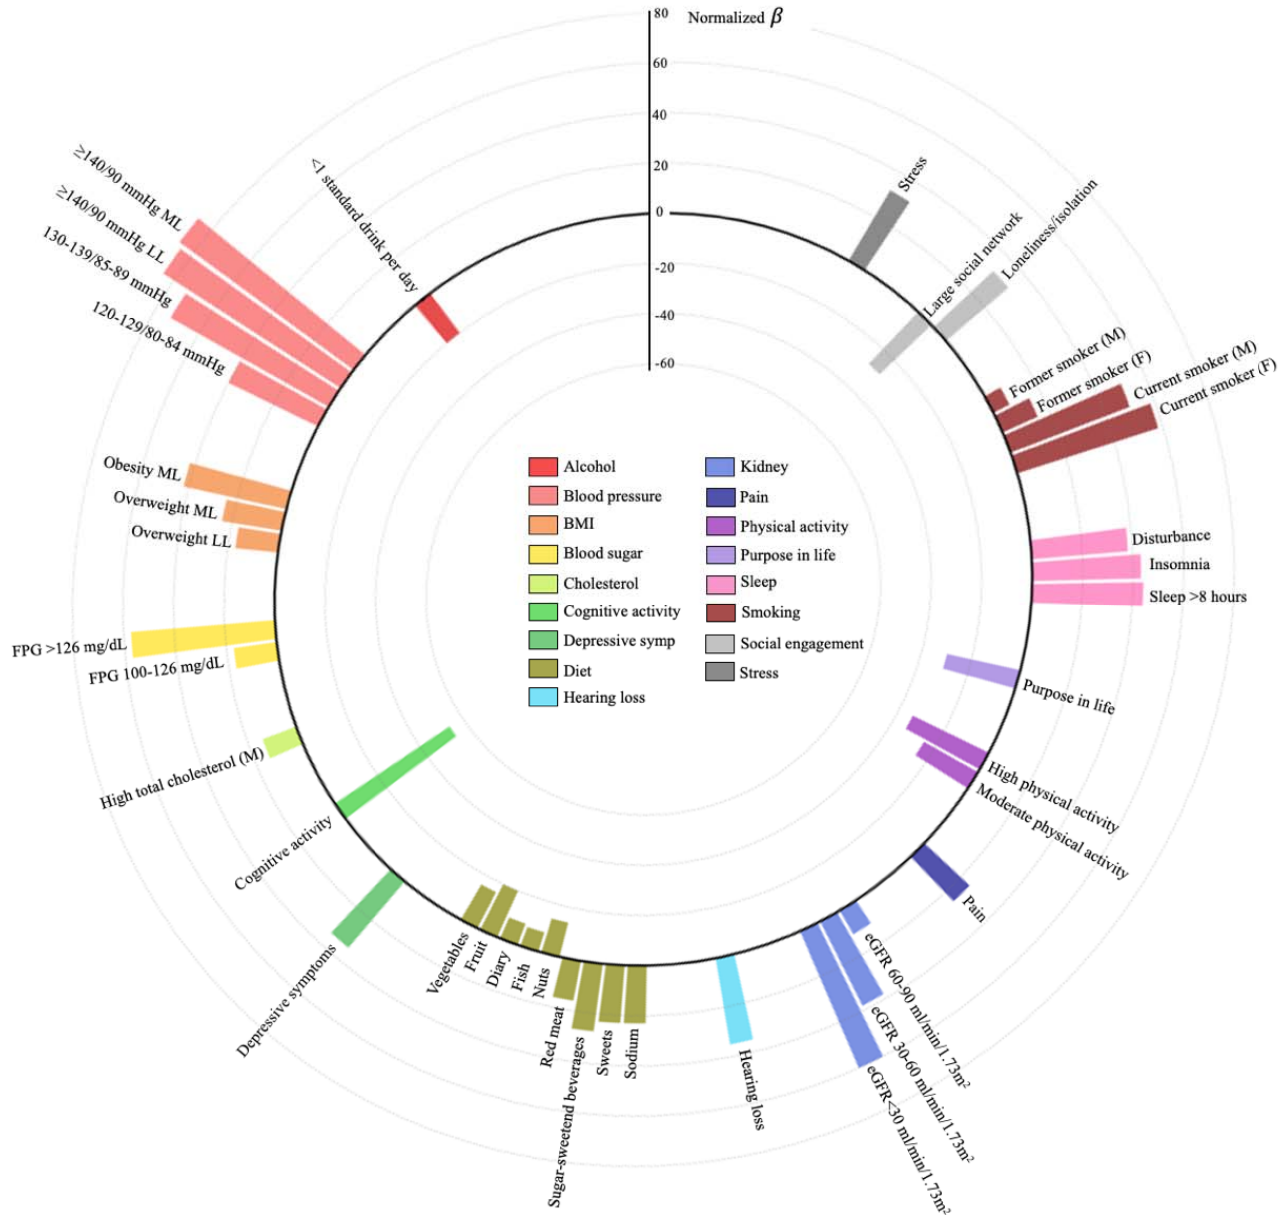

Abbreviations: dL: deciliter, eGFR: estimated glomerular filtration rate, F: female, FPG: fasting plasma glucose, LL: late-life, M: male, m: meters, mg: milligram, ML: midlife min: minutes, mmHg: millimeters mercury.

## Tables

**Table 1:** Selected studies and identification of the most relevant effect size

| Risk factor                                                    | Stroke                   |      |           |    |           | Dementia             |      |           |    |           | Late-life depression    |      |           |    |        |
|----------------------------------------------------------------|--------------------------|------|-----------|----|-----------|----------------------|------|-----------|----|-----------|-------------------------|------|-----------|----|--------|
|                                                                | Reference                | Est. | 95% CI    | ES | N=        | Reference            | Est. | 95% CI    | ES | N=        | Reference               | Est. | 95% CI    | ES | N=     |
| <b>Alcohol (ref never)</b>                                     |                          |      |           |    |           |                      |      |           |    |           |                         |      |           |    |        |
| ≥ 3 standard drinks/day                                        | Zhang <sup>157</sup>     | 1.20 | 1.01-1.43 | RR | 233,689   | Xu <sup>41</sup>     | 1.00 | 0.39-2.59 | RR | 73,330    | NA                      | NA   | NA        | NA | NA     |
| < 3 standard drinks/day                                        | Zhang <sup>157</sup>     | 1.01 | 0.93-1.09 | RR | 414,146   | Xu <sup>41</sup>     | 0.58 | 0.38-0.90 | RR | 73,330    | NA                      | NA   | NA        | NA | NA     |
| 1 standard drinks/day                                          | Zhang <sup>157</sup>     | 0.85 | 0.75-0.95 | RR | 414,146   | Xu <sup>41</sup>     | 0.75 | 0.51-1.11 | RR | 73,330    | NA                      | NA   | NA        | NA | NA     |
| <b>Blood pressure (ref &lt;120/80 mmHg)</b>                    |                          |      |           |    |           |                      |      |           |    |           |                         |      |           |    |        |
| 140/90 ML                                                      | Wang <sup>43</sup>       | 2.68 | 2.20-3.26 | RR | 279,088   | Ou <sup>49</sup>     | 1.20 | 1.06-1.35 | RR | 1,320,441 | Long <sup>158</sup>     | 1.16 | 0.91-1.42 | RR | 9,647  |
| 140/90 LL                                                      | Wang <sup>43</sup>       | 2.68 | 2.20-3.26 | RR | 279,088   | Ou <sup>49</sup>     | 1.01 | 0.96-1.06 | RR | 57,907    | Long <sup>158</sup>     | 1.16 | 0.91-1.42 | RR | 9,647  |
| 30-139/ 85-89                                                  | Huang <sup>45</sup>      | 1.95 | 1.73-2.21 | RR | 762,393   | NA                   | NA   | NA        | NA | NA        | NA                      | NA   | NA        | NA | NA     |
| 20-129 / 80-84                                                 | Huang <sup>45</sup>      | 1.44 | 1.27-1.63 | RR | 762,393   | NA                   | NA   | NA        | NA | NA        | NA                      | NA   | NA        | NA | NA     |
| <b>BMI (ref 18.5-25 kg/m2)</b>                                 |                          |      |           |    |           |                      |      |           |    |           |                         |      |           |    |        |
| ≥ 30                                                           | Wang <sup>159</sup>      | 1.47 | 1.02-2.11 | RR | 4,121,082 | Qu <sup>57</sup>     | 1.45 | 1.19-1.78 | RR | 41,656    | NA                      | NA   | NA        | NA | NA     |
| 25-30                                                          | Wang <sup>159</sup>      | 1.47 | 1.02-2.11 | RR | 4,121,082 | Qu <sup>57</sup>     | 0.78 | 0.70-0.86 | RR | 46,472    | NA                      | NA   | NA        | NA | NA     |
| 25-30                                                          | Wang <sup>159</sup>      | 1.25 | 1.16-1.34 | RR | 3,458,041 | Qu <sup>57</sup>     | 1.22 | 1.07-1.39 | RR | 53,690    | NA                      | NA   | NA        | NA | NA     |
| 25-30                                                          | Wang <sup>159</sup>      | 1.25 | 1.16-1.34 | RR | 3,458,041 | Qu <sup>57</sup>     | 0.82 | 0.74-0.92 | RR | 32,079    | NA                      | NA   | NA        | NA | NA     |
| < 18.5                                                         | Wang <sup>159</sup>      | 0.93 | 0.82-1.06 | RR | 3,917,021 | Qu <sup>57</sup>     | 1.42 | 1.12-1.80 | RR | 33,992    | NA                      | NA   | NA        | NA | NA     |
| < 18.5                                                         | Wang <sup>159</sup>      | 0.93 | 0.82-1.06 | RR | 3,917,021 | Qu <sup>57</sup>     | 1.23 | 1.03-1.48 | RR | 24,556    | NA                      | NA   | NA        | NA | NA     |
| <b>Blood Sugar (ref fasting plasma glucose &lt; 100 mg/dL)</b> |                          |      |           |    |           |                      |      |           |    |           |                         |      |           |    |        |
| > 126                                                          | Shi <sup>63</sup>        | 1.79 | 1.68-1.91 | RR | 2,524,770 | Xue <sup>66</sup>    | 1.21 | 1.06-1.37 | RR | 2,956,619 | NA                      | NA   | NA        | NA | NA     |
| 100-126                                                        | Shi <sup>63</sup>        | 1.16 | 1.11-1.21 | RR | 2,537,596 | Xue <sup>66</sup>    | 1.22 | 1.06-1.41 | RR | 2,956,619 | NA                      | NA   | NA        | NA | NA     |
| <b>Cholesterol (ref TC/LDL low)</b>                            |                          |      |           |    |           |                      |      |           |    |           |                         |      |           |    |        |
| High (Female)                                                  | Peters <sup>69</sup>     | 0.99 | 0.87-1.12 | RR | 786,621   | Zhu <sup>72</sup>    | 1.13 | 1.04-1.22 | RR | 153,690   | Valkanova <sup>74</sup> | 1.08 | 0.99-1.40 | OR | 17,959 |
| High (Male)                                                    | Peters <sup>69</sup>     | 1.14 | 1.03-1.27 | RR | 786,621   | Zhu <sup>72</sup>    | 1.13 | 1.04-1.22 | RR | 153,690   | Valkanova <sup>74</sup> | 1.08 | 0.99-1.40 | OR | 17,959 |
| DL                                                             | Yuan <sup>36</sup>       | 1.09 | 0.85-1.39 | RR | 6676      | NA                   | NA   | NA        | NA | NA        | NA                      | NA   | NA        | NA | NA     |
| <b>Cognitive activity (ref none)</b>                           |                          |      |           |    |           |                      |      |           |    |           |                         |      |           |    |        |
| Leisure time cognitive activity                                | NA                       | NA   | NA        | NA | NA        | Yates <sup>75</sup>  | 0.61 | 0.42-0.90 | RR | 1,932     | NA                      | NA   | NA        | NA | NA     |
| <b>Depressive symptoms (ref not present)</b>                   |                          |      |           |    |           |                      |      |           |    |           |                         |      |           |    |        |
| Depressive symptoms                                            | Eurelings <sup>76</sup>  | 1.36 | 1.13-1.51 | HR | 254,694   | NA                   | NA   | NA        | NA | NA        | NA                      | NA   | NA        | NA | NA     |
| <b>Diet (ref low)</b>                                          |                          |      |           |    |           |                      |      |           |    |           |                         |      |           |    |        |
| Vegetables high intake                                         | Hu <sup>77</sup>         | 0.86 | 0.79-0.93 | RR | 932,545   | NA                   | NA   | NA        | NA | NA        | NA                      | NA   | NA        | NA | NA     |
| Fruit high intake                                              | Bechthold <sup>78</sup>  | 0.83 | 0.77-0.89 | RR | 45,806    | NA                   | NA   | NA        | NA | NA        | NA                      | NA   | NA        | NA | NA     |
| Whole grain high intake                                        | Hu <sup>79</sup>         | 0.93 | 0.87-1.00 | RR | 877,897   | NA                   | NA   | NA        | NA | NA        | NA                      | NA   | NA        | NA | NA     |
| Dairy high intake                                              | Bechthold <sup>78</sup>  | 0.96 | 0.90-1.01 | RR | 452,216   | Talebi <sup>88</sup> | 0.72 | 0.58-0.89 | RR | 2,757     | NA                      | NA   | NA        | NA | NA     |
| Fish high intake                                               | Bechthold <sup>78</sup>  | 0.95 | 0.89-1.01 | RR | 409,128   | Bakre <sup>89</sup>  | 0.80 | 0.74-0.87 | RR | 40,668    | NA                      | NA   | NA        | NA | NA     |
| poultry high intake                                            | Papp <sup>80</sup>       | 0.97 | 0.87-1.02 | RR | 1,290,356 | NA                   | NA   | NA        | NA | NA        | NA                      | NA   | NA        | NA | NA     |
| Beans high intake                                              | Mendes <sup>81</sup>     | 1.00 | 0.93-1.08 | RR | 770,735   | NA                   | NA   | NA        | NA | NA        | NA                      | NA   | NA        | NA | NA     |
| Nuts high intake                                               | Shao <sup>82</sup>       | 0.88 | 0.80-0.97 | RR | 671,301   | NA                   | NA   | NA        | NA | NA        | NA                      | NA   | NA        | NA | NA     |
| Red meat high intake                                           | Bechthold <sup>78</sup>  | 1.16 | 1.08-1.25 | RR | 341,767   | NA                   | NA   | NA        | NA | NA        | NA                      | NA   | NA        | NA | NA     |
| Sugar Sweetened Beverage                                       | Wang <sup>83</sup>       | 1.12 | 1.03-1.23 | RR | 350,684   | Sun <sup>91</sup>    | 2.77 | 2.23-3.43 | HR | 5,660     | NA                      | NA   | NA        | NA | NA     |
| Sweets high intake                                             | Rossi <sup>84</sup>      | 1.23 | 1.07-1.41 | RR | 350,684   | NA                   | NA   | NA        | NA | NA        | NA                      | NA   | NA        | NA | NA     |
| Sodium high intake                                             | Strazzullo <sup>85</sup> | 1.23 | 1.06-1.43 | RR | 147,129   | NA                   | NA   | NA        | NA | NA        | NA                      | NA   | NA        | NA | NA     |

|                                                                |                            |      |           |    |           |                           |      |           |    |           |                             |      |           |    |         |
|----------------------------------------------------------------|----------------------------|------|-----------|----|-----------|---------------------------|------|-----------|----|-----------|-----------------------------|------|-----------|----|---------|
| aturated fats high intake                                      | Kang <sup>86</sup>         | 0.87 | 0.78-0.96 | RR | 598,435   | Zhu <sup>90</sup>         | 1.37 | 0.70-2.69 | RR | 7,395     | NA                          | NA   | NA        | NA | NA      |
| rotein high intake                                             | Zhang <sup>87</sup>        | 0.98 | 0.89-1.07 | RR | 528,982   | NA                        | NA   | NA        | NA | NA        | NA                          | NA   | NA        | NA | NA      |
| <b>learing loss (ref no loss)</b>                              |                            |      |           |    |           |                           |      |           |    |           |                             |      |           |    |         |
| resence of hearing loss                                        | Khosravipour <sup>92</sup> | 1.33 | 1.18-1.49 | HR | 5,014,271 | Liang <sup>93</sup>       | 1.59 | 1.37-1.86 | HR | 725,847   | Lawrence <sup>94</sup>      | 1.47 | 1.31-1.65 | OR | 147,148 |
| <b>idney function (ref eGFR ≥90 ml/min/1.73 m2)</b>            |                            |      |           |    |           |                           |      |           |    |           |                             |      |           |    |         |
| GFR <30                                                        | Masson <sup>96</sup>       | 1.70 | 1.47-1.96 | RR | 1,743,690 | Kjaergaard <sup>97</sup>  | 1.91 | 1.21-3.01 | HR | 468,699   | NA                          | NA   | NA        | NA | NA      |
| GFR 30-60                                                      | Masson <sup>96</sup>       | 1.43 | 1.33-1.54 | RR | 2,100,733 | Kjaergaard <sup>97</sup>  | 1.31 | 0.92-1.87 | HR | 468,699   | NA                          | NA   | NA        | NA | NA      |
| GFR 60-90                                                      | Masson <sup>96</sup>       | 1.10 | 1.03-1.19 | RR | 861,526   | Kjaergaard <sup>97</sup>  | 1.14 | 1.06-1.22 | HR | 468,699   | NA                          | NA   | NA        | NA | NA      |
| <b>'ain (ref no pain)</b>                                      |                            |      |           |    |           |                           |      |           |    |           |                             |      |           |    |         |
| 'ain present                                                   | NA                         | NA   | NA        | NA | NA        | Yuan <sup>98</sup>        | 1.26 | 1.18-1.35 | OR | 1,122,503 | NA                          | NA   | NA        | NA | NA      |
| <b>'hysical activity (ref low)</b>                             |                            |      |           |    |           |                           |      |           |    |           |                             |      |           |    |         |
| oderate physical activity                                      | Lee <sup>100</sup>         | 0.80 | 0.74-0.86 | RR | 357,791   | Iso-Markku <sup>103</sup> | 0.80 | 0.77-0.84 | OR | 257,983   | NA                          | NA   | NA        | NA | NA      |
| igh physical activity                                          | Lee <sup>100</sup>         | 0.73 | 0.67-0.79 | RR | 357,791   | Lee <sup>105</sup>        | 0.77 | 0.75-0.79 | RR | 75,447    | NA                          | NA   | NA        | NA | NA      |
| <b>ense of belonging/ purpose in life (ref no purpose)</b>     |                            |      |           |    |           |                           |      |           |    |           |                             |      |           |    |         |
| 'urpose in life present                                        | NA                         | NA   | NA        | NA | NA        | Sutin <sup>107</sup>      | 0.76 | 0.72-0.79 | HR | 202,393   | NA                          | NA   | NA        | NA | NA      |
| <b>leep (ref 6-8 hours)</b>                                    |                            |      |           |    |           |                           |      |           |    |           |                             |      |           |    |         |
| 8 hours of sleep                                               | Jike <sup>114</sup>        | 1.46 | 1.26-1.69 | RR | 542,218   | Fan <sup>118</sup>        | 1.77 | 1.32-2.37 | HR | 43,412    | NA                          | NA   | NA        | NA | NA      |
| 6 hours of sleep                                               | He <sup>115</sup>          | 1.10 | 0.97-1.24 | RR | 249,324   | Fan <sup>118</sup>        | 1.20 | 0.91-1.59 | HR | 43,412    | NA                          | NA   | NA        | NA | NA      |
| leep insomnia                                                  | Wu <sup>110</sup>          | 1.55 | 1.39-1.75 | RR | 23,312    | Shi <sup>120</sup>        | 1.17 | 0.95-1.43 | RR | 226,167   | NA                          | NA   | NA        | NA | NA      |
| leep problem/disturbance                                       | NA                         | NA   | NA        | NA | NA        | Shi <sup>120</sup>        | 1.19 | 1.11-1.29 | RR | 246,786   | Hill Almeida <sup>122</sup> | 1.82 | 1.69-1.97 | RR | 54,211  |
| <b>oking</b>                                                   |                            |      |           |    |           |                           |      |           |    |           |                             |      |           |    |         |
| <b>ref never)</b>                                              |                            |      |           |    |           |                           |      |           |    |           |                             |      |           |    |         |
| 'urrent (Female)                                               | Peters <sup>124</sup>      | 1.83 | 1.58-2.12 | RR | 3,817,289 | Zhong <sup>128</sup>      | 1.30 | 1.18-1.45 | RR | 937,293   | Lawrence <sup>94</sup>      | 1.35 | 1.00-1.81 | OR | 20,120  |
| 'urrent (Male)                                                 | Peters <sup>124</sup>      | 1.67 | 1.49-1.88 | RR | 3,817,289 | Zhong <sup>128</sup>      | 1.30 | 1.18-1.45 | RR | 937,293   | Lawrence <sup>94</sup>      | 1.35 | 1.00-1.81 | OR | 20,120  |
| 'ormer (Female)                                                | Peters <sup>124</sup>      | 1.17 | 1.12-1.22 | RR | 3,534,330 | Zhong <sup>128</sup>      | 1.01 | 0.96-1.06 | RR | 937,691   | NA                          | NA   | NA        | NA | NA      |
| 'ormer (Male)                                                  | Peters <sup>124</sup>      | 1.08 | 1.03-1.13 | RR | 3,534,330 | Zhong <sup>128</sup>      | 1.01 | 0.96-1.06 | RR | 937,691   | NA                          | NA   | NA        | NA | NA      |
| <b>ocial engagement (ref not lonely, small social network)</b> |                            |      |           |    |           |                           |      |           |    |           |                             |      |           |    |         |
| onely / Social isolated                                        | Valtorta <sup>130</sup>    | 1.32 | 1.04-1.68 | RR | 105,514   | Wang <sup>136</sup>       | 1.42 | 1.26-1.60 | RR | 83,765    | NA                          | NA   | NA        | NA | NA      |
| arge social network                                            | Park <sup>131</sup>        | 0.77 | 0.57-1.04 | RR | 23,576    | Wang <sup>136</sup>       | 0.81 | 0.74-0.89 | RR | 87,264    | NA                          | NA   | NA        | NA | NA      |
| <b>ress (no perceived stress)</b>                              |                            |      |           |    |           |                           |      |           |    |           |                             |      |           |    |         |
| erceived stress                                                | Booth <sup>137</sup>       | 1.33 | 1.17-1.50 | HR | 146,859   | Franks <sup>138</sup>     | 1.44 | 1.07-1.95 | HR | 1882      | NA                          | NA   | NA        | NA | NA      |

**Legend.** Abbreviations: CI = Confidence interval, dL = deciliter, eGFR = estimated Glomerulus Filtration Rate, ES = Effect Size, Est = Estimates, HR = Hazard Ratio, Kg = kilograms, LDL = Low Density Lipoprotein, LL = Late-life, mg = milligrams, ML = Midlife, mmHg = millimeters, Hg = mercury, N = number, NA = Not Applicable, OR = Odds Ratio, RR = Relative Risk, TC = total

**Table 2: DALY weighted effect sizes for a composite outcome**

| Variable                                                            | Definition                      | RR (95%CI)       | Normalized $\beta$ |
|---------------------------------------------------------------------|---------------------------------|------------------|--------------------|
| Alcohol<br>(ref never)                                              | >3 standard drinks/day          | 1.17 (0.92-1.94) | NA                 |
|                                                                     | 1-3 standard drinks/day         | 0.93 (0.85-1.01) | NA                 |
|                                                                     | <1 standard drinks/day          | 0.73 (0.74-0.93) | -20                |
| Blood pressure<br>(ref <120/80 mmHg)                                | $\geq 140/90$ ML                | 2.22 (1.81-2.63) | 87                 |
|                                                                     | $\geq 140/90$ LL                | 2.17 (1.76-2.58) | 85                 |
|                                                                     | 130-139/ 85-89                  | 1.95 (1.73-2.21) | 73                 |
|                                                                     | 120-129 / 80-84                 | 1.44 (1.27-1.63) | 40                 |
| BMI<br>(ref 18.5-25 kg/m <sup>2</sup> )                             | ML Obese ( $\geq 30$ )          | 1.47 (1.00-1.93) | 42                 |
|                                                                     | LL Obese ( $\geq 30$ )          | 1.34 (0.87-1.80) | NA                 |
|                                                                     | ML Overweight (25-30)           | 1.25 (1.17-1.33) | 24                 |
|                                                                     | LL Overweight (25-30)           | 1.17 (1.10-1.25) | 17                 |
|                                                                     | ML Underweight (<18.5)          | 0.99 (0.99-1.10) | NA                 |
| Blood sugar<br>(ref FPG <100mg/dL)                                  | LL Underweight (<18.5)          | 0.97 (0.86-1.08) | NA                 |
|                                                                     | FPG (>126)                      | 1.69 (1.59-1.79) | 57                 |
|                                                                     | FPG (100-126)                   | 1.17 (1.12-1.22) | 17                 |
| Cholesterol<br>(ref TC/LDL low)                                     | TC high (Female)                | 1.02 (0.92-1.11) | NA                 |
|                                                                     | TC high (Male)                  | 1.13 (1.04-1.12) | 14                 |
|                                                                     | LDL                             | 1.09 (0.85-1.39) | NA                 |
| Cognitive activity (ref none)                                       | Leisure time cognitive activity | 0.61 (0.42-0.90) | -54                |
| Depressive symptoms<br>(ref not present)                            | Present                         | 1.36 (1.13-1.51) | 34                 |
| Diet<br>(ref high)                                                  | Vegetables high intake          | 0.86 (0.79-0.93) | -16                |
|                                                                     | Fruit high intake               | 0.83 (0.77-0.89) | -20                |
|                                                                     | Whole grain high intake         | 0.93 (0.87-1.00) | NA                 |
|                                                                     | Dairy high intake               | 0.92 (0.87-0.98) | -9                 |
|                                                                     | Fish high intake                | 0.93 (0.87-0.98) | -8                 |
|                                                                     | Poultry high intake             | 0.97 (0.87-1.02) | NA                 |
|                                                                     | Beans high intake               | 1.00 (0.93-1.08) | NA                 |
|                                                                     | Nuts high intake                | 0.88 (0.80-0.97) | -14                |
|                                                                     | Red meat high intake            | 1.16 (1.08-1.25) | 16                 |
|                                                                     | Sugar Sweetened Beverage        | 1.28 (1.16-1.41) | 27                 |
|                                                                     | Sweets high intake              | 1.23 (1.07-1.47) | 23                 |
|                                                                     | Sodium high intake              | 1.23 (1.06-1.43) | 23                 |
|                                                                     | Saturated fats high intake      | 0.93 (0.76-1.10) | NA                 |
| Protein high intake                                                 | 0.98 (0.89-1.07)                | NA               |                    |
| Hearing loss<br>(ref no loss)                                       | Present                         | 1.37 (1.25-1.50) | 35                 |
| Kidney Function<br>(ref eGFR $\geq 90$ ml/min/1.73 m <sup>2</sup> ) | eGFR <30                        | 1.73 (1.48-1.98) | 60                 |
|                                                                     | eGFR 30-60                      | 1.41 (1.30-1.53) | 38                 |
|                                                                     | eGFR 60-90                      | 1.11 (1.04-1.17) | 11                 |
| Pain<br>(ref no pain)                                               | Present                         | 1.26 (1.18-1.35) | 25                 |
| Physical activity<br>(ref low)                                      | Moderate physical activity      | 0.80 (0.74-0.85) | -25                |
|                                                                     | High physical activity          | 0.74 (0.68-0.79) | -34                |
| Purpose in life<br>(ref no purpose)                                 | Present                         | 0.76 (0.72-0.79) | -30                |
| Sleep<br>(ref 6-8 hours/no problems)                                | >8 hours of sleep               | 1.50 (1.30-1.70) | 44                 |
|                                                                     | <6 hours of sleep               | 1.11 (0.99-1.24) | NA                 |
|                                                                     | Sleep insomnia                  | 1.49 (1.33-1.64) | 43                 |
|                                                                     | Sleep problem/disturbance       | 1.41 (1.34-1.49) | 38                 |
| Smoking<br>(ref never)                                              | Current (Female)                | 1.69 (1.48-1.91) | 58                 |
|                                                                     | Current (Male)                  | 1.58 (1.42-1.73) | 50                 |
|                                                                     | Former (Female)                 | 1.14 (1.10-1.19) | 15                 |
|                                                                     | Former (Male)                   | 1.07 (1.03-1.11) | 7                  |
| Social engagement<br>(ref not lonely/ small social network)         | Lonely / Social isolated        | 1.33 (1.06-1.61) | 32                 |
|                                                                     | Large social network            | 0.78 (0.58-0.98) | -28                |
| Stress (ref no perceived stress)                                    | Perceived stress                | 1.35 (1.17-1.52) | 32                 |

**Legend.** Abbreviations:  $\beta$ : beta-coefficient. CI: Confidence interval, dL: deciliter, eGFR: estimated Glomerulus Filtration Rate, Kg = kilograms, LDL = Low Density Lipoprotein, LL: Late-life, mg: milligrams, ML: Midlife, mmHg: millimeters, Ref: Reference, RR: relative risk, Hg: mercury, NA: Not Applicable, NS: Not Significant, TC: Total Cholesterol.
